# Supplementary material
Source: publisher site journal article supplement (https://www.spandidos-publications.com/7676/downloadSupplementary)
Supplement: Supplementary file 1 [file downloadSupplementary]

## Sheet: Table SIII
Table SIII. List of upregulated differentially expressed genes from RNA-seq data GSE290378
ID.	Gene name	P-value	log2FC	Regulated
ENSG00000001617	SEMA3F	7.359×10⁻⁴⁹	0.689947	Up
ENSG00000001630	CYP51A1	2.905×10⁻¹³⁶	1.06266	Up
ENSG00000003147	ICA1	1.326×10⁻³	0.643994	Up
ENSG00000003989	SLC7A2	7.222×10⁻¹⁷	0.98751	Up
ENSG00000004948	CALCR	1.346×10⁻¹³	1.2544	Up
ENSG00000005108	THSD7A	8.407×10⁻¹⁶	0.990772	Up
ENSG00000005238	FAM214B	1.55×10⁻¹⁸	0.738039	Up
ENSG00000005471	ABCB4	9.307×10⁻⁴	0.664634	Up
ENSG00000006042	TMEM98	1.873×10⁻²²	1.18564	Up
ENSG00000006468	ETV1	8.392×10⁻⁴¹	0.752027	Up
ENSG00000006757	PNPLA4	7.771×10⁻¹⁴	1.88491	Up
ENSG00000007047	MARK4	1.518×10⁻³¹	0.933563	Up
ENSG00000007255	TRAPPC6A	6.399×10⁻¹⁵	1.27547	Up
ENSG00000007384	RHBDF1	2.082×10⁻²³	0.833308	Up
ENSG00000007944	MYLIP	1.968×10⁻³	0.626048	Up
ENSG00000008516	MMP25	2.718×10⁻³	0.889064	Up
ENSG00000008517	IL32	1.415×10⁻⁵	1.73752	Up
ENSG00000009694	TENM1	9.747×10⁻²⁰	1.62131	Up
ENSG00000012124	CD22	2.007×10⁻¹³	0.731951	Up
ENSG00000012171	SEMA3B	7.203×10⁻⁸	0.66624	Up
ENSG00000015520	NPC1L1	1.583×10⁻⁵⁶	1.2613	Up
ENSG00000018236	CNTN1	1.699×10⁻⁹	2.62859	Up
ENSG00000019505	SYT13	7.451×10⁻³²	0.721978	Up
ENSG00000019549	SNAI2	2.455×10⁻³⁷	1.36072	Up
ENSG00000020181	ADGRA2	8.69×10⁻⁴¹	1.59625	Up
ENSG00000031081	ARHGAP31	2.785×10⁻⁶	0.933148	Up
ENSG00000035115	SH3YL1	2.248×10⁻²	0.646726	Up
ENSG00000038945	MSR1	2.454×10⁻³	0.593155	Up
ENSG00000039139	DNAH5	1.596×10⁻⁵	0.771893	Up
ENSG00000042317	SPATA7	3.643×10⁻⁸	0.851427	Up
ENSG00000042493	CAPG	2.191×10⁻⁵⁷	1.47659	Up
ENSG00000042980	ADAM28	1.798×10⁻⁴	0.892089	Up
ENSG00000044090	CUL7	7.533×10⁻³¹	0.792541	Up
ENSG00000046647	GEMIN8	5.461×10⁻⁷	0.640543	Up
ENSG00000046774	MAGEC2	5.526×10⁻⁴⁸	0.91298	Up
ENSG00000047346	FAM214A	4.617×10⁻¹⁵	1.05643	Up
ENSG00000047644	WWC3	1.346×10⁻⁴⁵	1.23881	Up
ENSG00000049239	H6PD	2.361×10⁻¹³	0.760956	Up
ENSG00000049769	PPP1R3F	2.526×10⁻⁸	1.07085	Up
ENSG00000051128	HOMER3	1.924×10⁻³⁹	0.787722	Up
ENSG00000052802	MSMO1	1.15×10⁻¹³⁹	1.50064	Up
ENSG00000054392	HHAT	6.74×10⁻¹⁶	0.705569	Up
ENSG00000054690	PLEKHH1	3.292×10⁻¹⁵	0.907931	Up
ENSG00000056558	TRAF1	1.552×10⁻⁴	0.66894	Up
ENSG00000060762	MPC1	1.191×10⁻⁴	0.690202	Up
ENSG00000061918	GUCY1B1	1.16×10⁻¹²	3.37552	Up
ENSG00000063180	CA11	3.334×10⁻¹⁶	1.20788	Up
ENSG00000063438	AHRR	1.969×10⁻⁶	0.780486	Up
ENSG00000063587	ZNF275	3.165×10⁻⁶	0.830002	Up
ENSG00000064042	LIMCH1	1.513×10⁻¹⁸	0.629349	Up
ENSG00000064225	ST3GAL6	2.712×10⁻⁵	0.762956	Up
ENSG00000064763	FAR2	2.254×10⁻⁴	1.02016	Up
ENSG00000065923	SLC9A7	2.993×10⁻¹⁵	0.667304	Up
ENSG00000065989	PDE4A	1.752×10⁻²	0.709503	Up
ENSG00000066056	TIE1	9.299×10⁻⁷	1.06712	Up
ENSG00000067064	IDI1	3.035×10⁻⁹²	1.11816	Up
ENSG00000069535	MAOB	1.693×10⁻¹²	0.902345	Up
ENSG00000070404	FSTL3	2.714×10⁻¹⁹	0.902516	Up
ENSG00000070540	WIPI1	4.772×10⁻²⁶	0.725286	Up
ENSG00000070961	ATP2B1	1.186×10⁻³⁰	0.625603	Up
ENSG00000071967	CYBRD1	1.385×10⁻⁴¹	0.742385	Up
ENSG00000072071	ADGRL1	8.979×10⁻³	0.859391	Up
ENSG00000072952	MRVI1	2.43×10⁻³	1.06904	Up
ENSG00000074590	NUAK1	4.863×10⁻⁴¹	0.782302	Up
ENSG00000074657	ZNF532	9.709×10⁻²⁴	0.805174	Up
ENSG00000075223	SEMA3C	7.441×10⁻⁹⁵	0.958501	Up
ENSG00000075399	VPS9D1	9.679×10⁻¹⁰	0.594175	Up
ENSG00000077150	NFKB2	1.302×10⁻⁵¹	0.857405	Up
ENSG00000077420	APBB1IP	3.682×10⁻¹²	0.723439	Up
ENSG00000077942	FBLN1	1.19×10⁻¹⁵²	2.14499	Up
ENSG00000078018	MAP2	7.419×10⁻¹⁰	0.756921	Up
ENSG00000078687	TNRC6C	2.742×10⁻⁸	1.04113	Up
ENSG00000078804	TP53INP2	1.288×10⁻²⁹	0.984062	Up
ENSG00000079112	CDH17	2.868×10⁻⁴	1.23746	Up
ENSG00000079150	FKBP7	5.815×10⁻⁹	0.666071	Up
ENSG00000079215	SLC1A3	1.151×10⁻²⁶	1.3439	Up
ENSG00000079459	FDFT1	1.686×10⁻⁶⁴	0.944066	Up
ENSG00000079482	OPHN1	2.216×10⁻⁵	0.686144	Up
ENSG00000079841	RIMS1	6.595×10⁻⁷³	1.07363	Up
ENSG00000080298	RFX3	2.927×10⁻¹¹	0.868458	Up
ENSG00000081087	OSTM1	5.637×10⁻¹⁴	0.603961	Up
ENSG00000082014	SMARCD3	4.123×10⁻³⁶	1.40863	Up
ENSG00000082397	EPB41L3	4.266×10⁻⁷	1.59993	Up
ENSG00000083750	RRAGB	1.586×10⁻⁷	0.622913	Up
ENSG00000083838	ZNF446	6.421×10⁻²³	0.799533	Up
ENSG00000084636	COL16A1	2.912×10⁻¹⁰	1.03676	Up
ENSG00000085552	IGSF9	5.859×10⁻¹²	0.773891	Up
ENSG00000086544	ITPKC	1.193×10⁻¹²	0.667172	Up
ENSG00000088538	DOCK3	1.986×10⁻³	0.71539	Up
ENSG00000088543	C3orf18	1.727×10⁻³	0.602727	Up
ENSG00000088899	LZTS3	9.609×10⁻¹⁹	0.597888	Up
ENSG00000089091	DZANK1	6.207×10⁻⁹	0.709949	Up
ENSG00000089289	IGBP1	9.594×10⁻³⁸	0.756415	Up
ENSG00000089351	GRAMD1A	8.638×10⁻¹⁹	0.612791	Up
ENSG00000089820	ARHGAP4	4.467×10⁻¹²⁸	1.76133	Up
ENSG00000089847	ANKRD24	1.326×10⁻⁸	1.45011	Up
ENSG00000089876	DHX32	1.959×10⁻²⁵	0.598354	Up
ENSG00000090006	LTBP4	3.269×10⁻¹²	0.949505	Up
ENSG00000090238	YPEL3	1.061×10⁻²⁶	1.76109	Up
ENSG00000091482	SMPX	3.618×10⁻³	1.059	Up
ENSG00000092531	SNAP23	1.62×10⁻²¹	0.618419	Up
ENSG00000095321	CRAT	4.014×10⁻¹⁴	0.60884	Up
ENSG00000095397	WHRN	2.586×10⁻¹⁹	0.800273	Up
ENSG00000095752	IL11	4.215×10⁻⁷⁷	1.49654	Up
ENSG00000099194	SCD	2.715×10⁻⁸⁹	0.830618	Up
ENSG00000099284	H2AFY2	5.019×10⁻⁷	1.71639	Up
ENSG00000099953	MMP11	2.399×10⁻¹⁶	2.08006	Up
ENSG00000099998	GGT5	2.544×10⁻⁴	1.32368	Up
ENSG00000100078	PLA2G3	1.53×10⁻⁴	1.36296	Up
ENSG00000100100	PIK3IP1	8.401×10⁻¹¹	1.97747	Up
ENSG00000100228	RAB36	5.841×10⁻³	0.768795	Up
ENSG00000100234	TIMP3	8.803×10⁻⁸⁰	1.37321	Up
ENSG00000100271	TTLL1	2.41×10⁻⁶	0.697797	Up
ENSG00000100284	TOM1	2.908×10⁻²⁰	0.618235	Up
ENSG00000100344	PNPLA3	7.787×10⁻²⁸	1.05591	Up
ENSG00000100360	IFT27	1.656×10⁻¹⁷	1.93347	Up
ENSG00000100814	CCNB1IP1	3.732×10⁻³¹	0.775282	Up
ENSG00000100867	DHRS2	2.42×10⁻⁴	0.615228	Up
ENSG00000100968	NFATC4	2.038×10⁻⁵	1.14545	Up
ENSG00000101197	BIRC7	8.603×10⁻²⁷	2.92593	Up
ENSG00000101230	ISM1	3.356×10⁻⁴	0.710173	Up
ENSG00000101236	RNF24	1.114×10⁻³⁰	0.763706	Up
ENSG00000101400	SNTA1	7.521×10⁻²⁷	0.830873	Up
ENSG00000101665	SMAD7	1.215×10⁻³⁶	0.735322	Up
ENSG00000101955	SRPX	1.019×10⁻³⁷	0.729806	Up
ENSG00000101986	ABCD1	3.051×10⁻⁹	0.723898	Up
ENSG00000102057	KCND1	9.413×10⁻¹²	0.72835	Up
ENSG00000102218	RP2	4.489×10⁻⁹	0.882507	Up
ENSG00000102316	MAGED2	4.094×10⁻³¹	0.862393	Up
ENSG00000102575	ACP5	1.329×10⁻⁴⁹	1.05005	Up
ENSG00000102804	TSC22D1	4.809×10⁻³²	0.605311	Up
ENSG00000102871	TRADD	2.061×10⁻⁷	0.665693	Up
ENSG00000102878	HSF4	8.679×10⁻⁷	0.806431	Up
ENSG00000102904	TSNAXIP1	2.962×10⁻⁴	1.09005	Up
ENSG00000103150	MLYCD	4.996×10⁻¹¹	0.758291	Up
ENSG00000103253	HAGHL	2.042×10⁻¹¹	0.699125	Up
ENSG00000103260	METRN	5.966×10⁻¹⁹	0.698351	Up
ENSG00000103269	RHBDL1	2.628×10⁻³	0.621331	Up
ENSG00000103381	CPPED1	9.425×10⁻⁴⁰	1.48838	Up
ENSG00000103485	QPRT	7.066×10⁻²¹	0.7597	Up
ENSG00000103544	VPS35L	2.532×10⁻⁶	0.677941	Up
ENSG00000103599	IQCH	2.742×10⁻²	0.639461	Up
ENSG00000103742	IGDCC4	1.591×10⁻¹³	1.04647	Up
ENSG00000103811	CTSH	2.295×10⁻⁹	0.637503	Up
ENSG00000104081	BMF	1.787×10⁻⁵⁰	0.790007	Up
ENSG00000104219	ZDHHC2	5.613×10⁻²⁰	0.864849	Up
ENSG00000104332	SFRP1	5.518×10⁻³⁴	1.61371	Up
ENSG00000104361	NIPAL2	8.362×10⁻¹⁶	2.29671	Up
ENSG00000104497	SNX16	3.394×10⁻⁶	0.624209	Up
ENSG00000104549	SQLE	4.582×10⁻⁸¹	0.978315	Up
ENSG00000104856	RELB	1.728×10⁻²²	1.11296	Up
ENSG00000104870	FCGRT	1.737×10⁻²⁴	0.870503	Up
ENSG00000104899	AMH	6.851×10⁻¹¹	0.661738	Up
ENSG00000104936	DMPK	4.623×10⁻⁵⁴	0.99403	Up
ENSG00000105204	DYRK1B	4.203×10⁻²¹	0.792048	Up
ENSG00000105270	CLIP3	1.262×10⁻⁴	0.83197	Up
ENSG00000105327	BBC3	3.38×10⁻²⁶	1.21319	Up
ENSG00000105373	NOP53	5.265×10⁻⁷⁰	0.733165	Up
ENSG00000105404	RABAC1	3.44×10⁻¹²	0.629438	Up
ENSG00000105419	MEIS3	1.085×10⁻⁵	1.72348	Up
ENSG00000105499	PLA2G4C	1.657×10⁻⁸	1.75829	Up
ENSG00000105516	DBP	7.418×10⁻¹⁵	0.979349	Up
ENSG00000105519	CAPS	7.527×10⁻¹³	1.52512	Up
ENSG00000105711	SCN1B	2.001×10⁻¹³	1.58734	Up
ENSG00000105792	CFAP69	3.842×10⁻⁹	0.655696	Up
ENSG00000105808	RASA4	2.046×10⁻³	1.32814	Up
ENSG00000105825	TFPI2	6.987×10⁻²³	0.768131	Up
ENSG00000105855	ITGB8	2.379×10⁻³⁴	1.58792	Up
ENSG00000105856	HBP1	1.947×10⁻³⁵	0.909642	Up
ENSG00000105997	HOXA3	1.604×10⁻²⁰	0.724678	Up
ENSG00000106066	CPVL	1.592×10⁻²⁴	0.636278	Up
ENSG00000106261	ZKSCAN1	4.495×10⁻²⁵	0.604968	Up
ENSG00000106415	GLCCI1	8.802×10⁻¹³	0.897021	Up
ENSG00000106479	ZNF862	2.549×10⁻¹⁶	1.48175	Up
ENSG00000106571	GLI3	2.071×10⁻⁴	4.94735	Up
ENSG00000106799	TGFBR1	3.999×10⁻¹⁰⁷	1.37042	Up
ENSG00000106804	C5	2.051×10⁻⁶	0.757072	Up
ENSG00000106927	AMBP	1.07×10⁻⁴	0.723186	Up
ENSG00000106991	ENG	1.546×10⁻⁵³	1.94065	Up
ENSG00000107611	CUBN	7.725×10⁻³	0.764665	Up
ENSG00000107798	LIPA	1.237×10⁻⁵⁷	0.833231	Up
ENSG00000107816	LZTS2	1.76×10⁻⁷⁶	0.94763	Up
ENSG00000107819	SFXN3	1.133×10⁻³⁰	0.74306	Up
ENSG00000107821	KAZALD1	2.444×10⁻²	0.804108	Up
ENSG00000107882	SUFU	5.555×10⁻¹⁸	0.64765	Up
ENSG00000107957	SH3PXD2A	1.322×10⁻²³	0.590755	Up
ENSG00000108515	ENO3	7.249×10⁻⁶	0.666696	Up
ENSG00000108984	MAP2K6	6.482×10⁻¹⁷	0.627839	Up
ENSG00000109472	CPE	2.292×10⁻⁶	0.611111	Up
ENSG00000109475	RPL34	5.767×10⁻⁴	0.604671	Up
ENSG00000109654	TRIM2	3.377×10⁻²⁴	0.675602	Up
ENSG00000110042	DTX4	6.374×10⁻⁵	1.61135	Up
ENSG00000110237	ARHGEF17	1.448×10⁻²²	0.676572	Up
ENSG00000110318	CEP126	1.089×10⁻¹²	0.810193	Up
ENSG00000110436	SLC1A2	1.296×10⁻²	0.790553	Up
ENSG00000110628	SLC22A18	3.448×10⁻¹⁷	0.942307	Up
ENSG00000110921	MVK	1.881×10⁻²⁰	0.779027	Up
ENSG00000111087	GLI1	4.808×10⁻²	0.707021	Up
ENSG00000111799	COL12A1	9.949×10⁻³	0.62822	Up
ENSG00000111860	CEP85L	3.052×10⁻³	0.714392	Up
ENSG00000111863	ADTRP	2.042×10⁻³	0.844255	Up
ENSG00000112139	MDGA1	3.919×10⁻⁴	0.653697	Up
ENSG00000112306	RPS12	2.765×10⁻²	0.678961	Up
ENSG00000112406	HECA	5.497×10⁻¹⁶	0.992945	Up
ENSG00000112561	TFEB	1.492×10⁻³	0.734606	Up
ENSG00000112759	SLC29A1	7.145×10⁻³³	0.620049	Up
ENSG00000112769	LAMA4	4.86×10⁻⁶³	0.984857	Up
ENSG00000112852	PCDHB2	4.014×10⁻⁶	1.51982	Up
ENSG00000112972	HMGCS1	4.957×10⁻¹⁷⁹	1.64182	Up
ENSG00000113248	PCDHB15	3.249×10⁻³	1.02113	Up
ENSG00000113721	PDGFRB	4.388×10⁻²⁵	1.03432	Up
ENSG00000114268	PFKFB4	9.346×10⁻²¹	0.597727	Up
ENSG00000114270	COL7A1	2.17×10⁻¹²	0.677924	Up
ENSG00000114378	HYAL1	1.136×10⁻¹⁸	0.641008	Up
ENSG00000114423	CBLB	5.804×10⁻²⁴	1.01524	Up
ENSG00000114473	IQCG	9.948×10⁻⁸	0.746188	Up
ENSG00000114626	ABTB1	7.849×10⁻¹²	0.601898	Up
ENSG00000114796	KLHL24	2.548×10⁻⁶²	1.49726	Up
ENSG00000114812	VIPR1	1.812×10⁻¹³	1.60263	Up
ENSG00000114841	DNAH1	4.959×10⁻⁶	1.3083	Up
ENSG00000115084	SLC35F5	1.494×10⁻²⁴	0.596066	Up
ENSG00000115221	ITGB6	3.147×10⁻⁵	0.97906	Up
ENSG00000115226	FNDC4	9.638×10⁻¹³	0.671257	Up
ENSG00000115252	PDE1A	1.432×10⁻³	0.609105	Up
ENSG00000115257	PCSK4	1.932×10⁻⁴	0.642047	Up
ENSG00000115380	EFEMP1	5.036×10⁻⁸	0.595662	Up
ENSG00000115414	FN1	7.38×10⁻⁴³	0.633568	Up
ENSG00000115423	DNAH6	5.372×10⁻⁵	1.26941	Up
ENSG00000115461	IGFBP5	5.549×10⁻²⁴	3.34507	Up
ENSG00000115718	PROC	1.15×10⁻⁹	2.41906	Up
ENSG00000116106	EPHA4	1.139×10⁻¹²	0.894425	Up
ENSG00000116132	PRRX1	1.096×10⁻³²	3.11644	Up
ENSG00000116183	PAPPA2	5.493×10⁻⁷	0.956455	Up
ENSG00000116604	MEF2D	1.301×10⁻²⁹	0.768633	Up
ENSG00000116668	SWT1	8.635×10⁻⁶	0.700338	Up
ENSG00000116852	KIF21B	4.831×10⁻⁵⁵	2.13834	Up
ENSG00000116990	MYCL	3.781×10⁻²	0.593767	Up
ENSG00000117016	RIMS3	2.888×10⁻⁹	0.731009	Up
ENSG00000117139	KDM5B	8.708×10⁻⁵⁹	0.912076	Up
ENSG00000117533	VAMP4	6.206×10⁻⁹	0.589853	Up
ENSG00000117868	ESYT2	8.134×10⁻³¹	0.615798	Up
ENSG00000118292	C1orf54	4.529×10⁻³	0.704473	Up
ENSG00000118407	FILIP1	1.111×10⁻⁸	0.626493	Up
ENSG00000118432	CNR1	1.778×10⁻⁸	0.668092	Up
ENSG00000118523	CTGF	3.67×10⁻²²	0.600106	Up
ENSG00000118762	PKD2	1.071×10⁻²²	0.617557	Up
ENSG00000118777	ABCG2	3.095×10⁻⁹	0.739794	Up
ENSG00000118816	CCNI	2.966×10⁻³⁴	0.593374	Up
ENSG00000118873	RAB3GAP2	1.436×10⁻²²	0.58953	Up
ENSG00000118997	DNAH7	1.981×10⁻⁵	0.801402	Up
ENSG00000119242	CCDC92	9.659×10⁻³⁶	1.68901	Up
ENSG00000119280	C1orf198	5.505×10⁻⁴⁰	0.864835	Up
ENSG00000119547	ONECUT2	5.335×10⁻³⁸	0.71034	Up
ENSG00000119630	PGF	1.341×10⁻²⁰	1.61281	Up
ENSG00000119638	NEK9	6.918×10⁻¹⁹	0.67314	Up
ENSG00000119681	LTBP2	6.627×10⁻²⁶	0.837283	Up
ENSG00000119711	ALDH6A1	8.163×10⁻¹⁷	0.675614	Up
ENSG00000119729	RHOQ	2.17×10⁻²⁵	0.586858	Up
ENSG00000119801	YPEL5	1.263×10⁻⁴⁴	1.1864	Up
ENSG00000119899	SLC17A5	9.679×10⁻¹⁷	0.676161	Up
ENSG00000120251	GRIA2	3.974×10⁻⁸	0.816906	Up
ENSG00000120318	ARAP3	2.707×10⁻⁸	0.71759	Up
ENSG00000120437	ACAT2	8.438×10⁻²⁷	0.673097	Up
ENSG00000120738	EGR1	3.667×10⁻⁴	0.827484	Up
ENSG00000120875	DUSP4	9.883×10⁻⁸⁵	0.879317	Up
ENSG00000120885	CLU	2.218×10⁻¹⁰⁷	1.22637	Up
ENSG00000120915	EPHX2	4.978×10⁻¹³	0.871475	Up
ENSG00000121039	RDH10	2.527×10⁻²¹	0.681746	Up
ENSG00000121281	ADCY7	4.181×10⁻⁷	0.67518	Up
ENSG00000121310	ECHDC2	4.681×10⁻⁵	1.22753	Up
ENSG00000121753	ADGRB2	3.597×10⁻¹⁰	1.17424	Up
ENSG00000121769	FABP3	7.485×10⁻¹²	2.56876	Up
ENSG00000122042	UBL3	1.069×10⁻¹⁰	0.918214	Up
ENSG00000122641	INHBA	2.715×10⁻⁸⁰	1.10329	Up
ENSG00000122674	CCZ1	2.283×10⁻¹¹	0.794738	Up
ENSG00000122678	POLM	1.85×10⁻²⁵	0.768662	Up
ENSG00000122741	DCAF10	3.487×10⁻³⁰	0.80645	Up
ENSG00000122862	SRGN	3.038×10⁻¹⁸	2.02647	Up
ENSG00000122877	EGR2	3.06×10⁻⁴	1.2946	Up
ENSG00000123096	SSPN	5.65×10⁻²⁷	1.20316	Up
ENSG00000123191	ATP7B	5.629×10⁻⁴	0.873712	Up
ENSG00000123384	LRP1	9.416×10⁻³²	0.595992	Up
ENSG00000123689	G0S2	2.039×10⁻⁸⁹	2.94231	Up
ENSG00000123700	KCNJ2	2.967×10⁻¹⁷	1.18737	Up
ENSG00000123836	PFKFB2	1.807×10⁻¹⁹	0.661052	Up
ENSG00000123933	MXD4	1.047×10⁻⁴⁸	1.34593	Up
ENSG00000123989	CHPF	2.482×10⁻⁷⁸	1.21231	Up
ENSG00000124006	OBSL1	2.039×10⁻²⁹	0.848122	Up
ENSG00000124098	FAM210B	3.189×10⁻¹⁹	0.710909	Up
ENSG00000124171	PARD6B	2.777×10⁻¹⁵	0.738184	Up
ENSG00000124222	STX16	5.966×10⁻³¹	0.591556	Up
ENSG00000124225	PMEPA1	1.873×10⁻²⁶⁰	1.94883	Up
ENSG00000124374	PAIP2B	6.399×10⁻⁵	0.805154	Up
ENSG00000124587	PEX6	2.253×10⁻¹²	0.748713	Up
ENSG00000124613	ZNF391	1.393×10⁻³	1.058	Up
ENSG00000125089	SH3TC1	2.829×10⁻¹⁰	2.06488	Up
ENSG00000125122	LRRC29	5.672×10⁻⁴	1.01075	Up
ENSG00000125246	CLYBL	2.679×10⁻³	0.953791	Up
ENSG00000125247	TMTC4	1.062×10⁻⁵	0.678754	Up
ENSG00000125430	HS3ST3B1	6.691×10⁻³⁰	3.01579	Up
ENSG00000125510	OPRL1	4.485×10⁻⁷	1.32585	Up
ENSG00000125538	IL1B	1.713×10⁻²	0.591303	Up
ENSG00000125648	SLC25A23	7.815×10⁻⁴⁴	0.831623	Up
ENSG00000125740	FOSB	4.66×10⁻¹³	1.80757	Up
ENSG00000125827	TMX4	1.94×10⁻⁴⁸	0.814592	Up
ENSG00000125845	BMP2	8.813×10⁻¹⁴	0.680726	Up
ENSG00000125848	FLRT3	3.586×10⁻²²	1.0065	Up
ENSG00000125864	BFSP1	1.056×10⁻⁹	0.824898	Up
ENSG00000125965	GDF5	2.807×10⁻²¹	1.01891	Up
ENSG00000125967	NECAB3	9.608×10⁻²⁵	0.724336	Up
ENSG00000126091	ST3GAL3	3.392×10⁻⁷	0.601584	Up
ENSG00000126562	WNK4	1.396×10⁻⁹	0.651473	Up
ENSG00000126603	GLIS2	7.234×10⁻²⁵	0.972417	Up
ENSG00000126860	EVI2A	3.732×10⁻¹⁹	1.10933	Up
ENSG00000126882	FAM78A	5.586×10⁻⁶	0.953171	Up
ENSG00000127415	IDUA	6.145×10⁻²⁸	1.22551	Up
ENSG00000127528	KLF2	3.825×10⁻⁷	1.20458	Up
ENSG00000127838	PNKD	7.718×10⁻³⁰	0.640441	Up
ENSG00000127863	TNFRSF19	3.817×10⁻⁹	1.34444	Up
ENSG00000127920	GNG11	1.188×10⁻³²	0.955135	Up
ENSG00000128311	TST	1.639×10⁻¹⁰	0.766178	Up
ENSG00000128590	DNAJB9	8.827×10⁻²²	0.934232	Up
ENSG00000128596	CCDC136	5.046×10⁻³	0.752638	Up
ENSG00000128872	TMOD2	3.162×10⁻⁶	0.702398	Up
ENSG00000129038	LOXL1	1.655×10⁻³⁶	1.3164	Up
ENSG00000129295	LRRC6	2.371×10⁻⁵	1.08936	Up
ENSG00000129646	QRICH2	1.603×10⁻³	1.10409	Up
ENSG00000130164	LDLR	3.119×10⁻²⁹	0.617087	Up
ENSG00000130176	CNN1	8.735×10⁻¹⁰	1.23461	Up
ENSG00000130208	APOC1	8.175×10⁻¹²	1.05194	Up
ENSG00000130304	SLC27A1	5.068×10⁻¹²	0.760453	Up
ENSG00000130313	PGLS	2.026×10⁻¹⁷	0.597752	Up
ENSG00000130475	FCHO1	2.126×10⁻⁷	1.73315	Up
ENSG00000130522	JUND	8.5×10⁻⁴⁶	0.869844	Up
ENSG00000130758	MAP3K10	7.573×10⁻⁴⁰	0.849905	Up
ENSG00000130958	SLC35D2	2.981×10⁻²²	0.619085	Up
ENSG00000131069	ACSS2	3.558×10⁻⁸²	1.1232	Up
ENSG00000131242	RAB11FIP4	7.743×10⁻⁵	0.736088	Up
ENSG00000131773	KHDRBS3	5.51×10⁻⁹	0.677296	Up
ENSG00000132000	PODNL1	1.195×10⁻⁷	2.08061	Up
ENSG00000132003	ZSWIM4	1.489×10⁻⁴⁶	1.25947	Up
ENSG00000132031	MATN3	1.635×10⁻⁴	0.68808	Up
ENSG00000132196	HSD17B7	2.299×10⁻⁴⁵	1.11302	Up
ENSG00000132334	PTPRE	2.362×10⁻²³	0.812992	Up
ENSG00000132535	DLG4	5.849×10⁻²¹	0.735058	Up
ENSG00000132639	SNAP25	3.478×10⁻¹⁶	1.36332	Up
ENSG00000132640	BTBD3	4.204×10⁻²⁹	0.709979	Up
ENSG00000132718	SYT11	7.539×10⁻²⁵	0.771263	Up
ENSG00000132749	TESMIN	2.73×10⁻³	0.597193	Up
ENSG00000132950	ZMYM5	1.817×10⁻⁷	0.712816	Up
ENSG00000133048	CHI3L1	4.306×10⁻³³	1.15538	Up
ENSG00000133055	MYBPH	2.788×10⁻¹⁹	3.38404	Up
ENSG00000133433	GSTT2B	1.076×10⁻⁵	0.748951	Up
ENSG00000133627	ACTR3B	2.327×10⁻⁴	0.587813	Up
ENSG00000133687	TMTC1	4.707×10⁻⁹	1.14493	Up
ENSG00000133740	E2F5	5.161×10⁻¹⁹	0.653425	Up
ENSG00000134109	EDEM1	1.276×10⁻¹⁵	0.608057	Up
ENSG00000134115	CNTN6	3.274×10⁻¹²	2.06612	Up
ENSG00000134184	GSTM1	2.195×10⁻²¹	0.96203	Up
ENSG00000134242	PTPN22	3.888×10⁻²²	2.94589	Up
ENSG00000134245	WNT2B	8.52×10⁻⁴	0.898485	Up
ENSG00000134532	SOX5	1.773×10⁻²	0.778288	Up
ENSG00000134824	FADS2	1.803×10⁻⁴³	0.627516	Up
ENSG00000134864	GGACT	3.474×10⁻⁴	0.949022	Up
ENSG00000134955	SLC37A2	8.314×10⁻⁷³	1.12431	Up
ENSG00000135205	CCDC146	4.498×10⁻³	0.886711	Up
ENSG00000135218	CD36	2.864×10⁻²⁶	1.99328	Up
ENSG00000135253	KCP	1.512×10⁻⁵⁸	0.96643	Up
ENSG00000135299	ANKRD6	3.495×10⁻⁵	0.738024	Up
ENSG00000135318	NT5E	1.134×10⁻¹¹⁸	1.19589	Up
ENSG00000135424	ITGA7	1.122×10⁻¹⁵	0.858692	Up
ENSG00000135437	RDH5	6.914×10⁻³	0.992464	Up
ENSG00000135596	MICAL1	3.554×10⁻⁶¹	1.0638	Up
ENSG00000135643	KCNMB4	3.182×10⁻¹³	1.90487	Up
ENSG00000135749	PCNX2	1.147×10⁻²⁰	0.941958	Up
ENSG00000135838	NPL	1.687×10⁻³	0.772321	Up
ENSG00000136158	SPRY2	7.769×10⁻²⁷	0.721631	Up
ENSG00000136367	ZFHX2	1.023×10⁻⁶	0.964691	Up
ENSG00000136603	SKIL	3.741×10⁻⁴	0.931008	Up
ENSG00000136643	RPS6KC1	1.258×10⁻¹⁵	0.594664	Up
ENSG00000137103	TMEM8B	1.052×10⁻⁵	0.679446	Up
ENSG00000137171	KLC4	2.772×10⁻²⁷	0.838758	Up
ENSG00000137474	MYO7A	5.508×10⁻¹⁸	2.00191	Up
ENSG00000137575	SDCBP	2.812×10⁻⁴²	0.763984	Up
ENSG00000137809	ITGA11	5.053×10⁻⁴²	2.58535	Up
ENSG00000137959	IFI44L	2.824×10⁻¹⁷	0.600671	Up
ENSG00000138131	LOXL4	3.143×10⁻²³	2.55128	Up
ENSG00000138172	CALHM2	2.956×10⁻³	0.858296	Up
ENSG00000138386	NAB1	7.367×10⁻²⁵	0.588567	Up
ENSG00000138439	FAM117B	3.735×10⁻¹⁹	0.850423	Up
ENSG00000138613	APH1B	2.772×10⁻⁹	0.729137	Up
ENSG00000138735	PDE5A	9.957×10⁻⁹	0.93707	Up
ENSG00000138764	CCNG2	9.637×10⁻²⁷	1.1101	Up
ENSG00000139112	GABARAPL1	1.202×10⁻⁴⁹	1.35398	Up
ENSG00000139182	CLSTN3	1.084×10⁻²⁷	0.699395	Up
ENSG00000139187	KLRG1	2.014×10⁻⁵	1.78943	Up
ENSG00000139211	AMIGO2	3.086×10⁻⁷³	1.0066	Up
ENSG00000139263	LRIG3	1.856×10⁻¹⁷	0.641957	Up
ENSG00000139318	DUSP6	6.623×10⁻²⁸	0.699353	Up
ENSG00000139329	LUM	1.492×10⁻⁴	0.696896	Up
ENSG00000139344	AMDHD1	6.535×10⁻³	0.98436	Up
ENSG00000139428	MMAB	3.541×10⁻²⁷	0.826388	Up
ENSG00000139625	MAP3K12	1.873×10⁻³³	0.758843	Up
ENSG00000140092	FBLN5	9.608×10⁻⁸	1.23417	Up
ENSG00000140398	NEIL1	1.106×10⁻⁴	0.66833	Up
ENSG00000140564	FURIN	1.838×10⁻¹⁰⁰	1.4416	Up
ENSG00000140577	CRTC3	9.641×10⁻¹²	0.601221	Up
ENSG00000140675	SLC5A2	2.388×10⁻⁴	1.22984	Up
ENSG00000140682	TGFB1I1	5.7×10⁻²³	0.815937	Up
ENSG00000141012	GALNS	3.019×10⁻¹¹	0.833746	Up
ENSG00000141034	GID4	4.663×10⁻¹⁶	0.886409	Up
ENSG00000141232	TOB1	1.65×10⁻¹⁷	0.631932	Up
ENSG00000141526	SLC16A3	1.92×10⁻¹³	1.11785	Up
ENSG00000141665	FBXO15	9.423×10⁻¹⁵	2.06314	Up
ENSG00000141837	CACNA1A	8.454×10⁻²⁶	2.21318	Up
ENSG00000141933	TPGS1	7.452×10⁻²⁴	0.998356	Up
ENSG00000142102	PGGHG	2.148×10⁻¹⁵	0.636814	Up
ENSG00000142185	TRPM2	6.121×10⁻¹¹	2.04739	Up
ENSG00000142459	EVI5L	1.447×10⁻⁸	0.953107	Up
ENSG00000142552	RCN3	1.41×10⁻⁴	0.747339	Up
ENSG00000142619	PADI3	1.453×10⁻¹⁵²	1.47345	Up
ENSG00000142694	EVA1B	1.361×10⁻⁹	0.661378	Up
ENSG00000143127	ITGA10	3.733×10⁻⁴⁶	1.77704	Up
ENSG00000143147	GPR161	1.006×10⁻¹⁸	0.612385	Up
ENSG00000143248	RGS5	1.994×10⁻⁵⁹	0.792517	Up
ENSG00000143303	RRNAD1	8.362×10⁻¹²	0.660513	Up
ENSG00000143382	ADAMTSL4	2.745×10⁻¹⁰	0.640191	Up
ENSG00000143387	CTSK	4.079×10⁻⁴	0.789126	Up
ENSG00000143412	ANXA9	4.398×10⁻⁷	0.639342	Up
ENSG00000143469	SYT14	5.55×10⁻³⁰	1.2951	Up
ENSG00000143473	KCNH1	8.619×10⁻¹¹	1.32964	Up
ENSG00000143507	DUSP10	5.39×10⁻³⁶	0.784093	Up
ENSG00000143578	CREB3L4	7.341×10⁻¹⁷	0.709547	Up
ENSG00000143786	CNIH3	1.547×10⁻⁸	1.93807	Up
ENSG00000143845	ETNK2	1.028×10⁻¹⁰	0.732299	Up
ENSG00000144278	GALNT13	1.524×10⁻¹¹	0.781958	Up
ENSG00000144331	ZNF385B	5.243×10⁻¹⁹	1.26461	Up
ENSG00000144366	GULP1	1.386×10⁻³⁸	0.799502	Up
ENSG00000144711	IQSEC1	4.587×10⁻⁵⁴	1.52114	Up
ENSG00000144935	TRPC1	1.594×10⁻⁶	0.847375	Up
ENSG00000145040	UCN2	7.288×10⁻³¹	0.863634	Up
ENSG00000145217	SLC26A1	4.931×10⁻¹⁰	0.770567	Up
ENSG00000145423	SFRP2	1.984×10⁻¹⁹	1.04224	Up
ENSG00000145476	CYP4V2	8.061×10⁻⁷	0.616241	Up
ENSG00000145675	PIK3R1	1.226×10⁻¹⁸	0.750657	Up
ENSG00000145703	IQGAP2	1.216×10⁻⁵	1.77767	Up
ENSG00000145743	FBXL17	5.782×10⁻¹⁸	0.825982	Up
ENSG00000146083	RNF44	4.662×10⁻²²	0.616635	Up
ENSG00000146085	MUT	9.802×10⁻¹⁸	0.680198	Up
ENSG00000146278	PNRC1	9.986×10⁻⁶¹	1.07248	Up
ENSG00000146411	SLC2A12	1.017×10⁻²	0.636942	Up
ENSG00000146833	TRIM4	1.587×10⁻²²	0.590122	Up
ENSG00000146938	NLGN4X	3.108×10⁻¹⁹	0.717535	Up
ENSG00000147614	ATP6V0D2	5.908×10⁻¹¹	0.797517	Up
ENSG00000147883	CDKN2B	4.841×10⁻³¹	0.783226	Up
ENSG00000148541	FAM13C	3.394×10⁻²	0.688364	Up
ENSG00000148814	LRRC27	6.988×10⁻⁹	0.721668	Up
ENSG00000148832	PAOX	8.419×10⁻⁸	0.694998	Up
ENSG00000149016	TUT1	7.95×10⁻¹¹	0.775297	Up
ENSG00000149474	KAT14	4.56×10⁻¹⁵	0.598893	Up
ENSG00000149485	FADS1	5.139×10⁻⁵⁰	0.737889	Up
ENSG00000149591	TAGLN	9.544×10⁻⁶	1.12275	Up
ENSG00000149809	TM7SF2	1.051×10⁻⁵¹	1.07888	Up
ENSG00000149823	VPS51	6.23×10⁻²²	0.637683	Up
ENSG00000149948	HMGA2	7.604×10⁻⁴¹	0.621759	Up
ENSG00000149970	CNKSR2	1.393×10⁻²¹	0.99729	Up
ENSG00000150281	CTF1	6.614×10⁻¹¹	1.49653	Up
ENSG00000150593	PDCD4	3.624×10⁻²¹	0.637471	Up
ENSG00000150630	VEGFC	4.177×10⁻³²	1.08477	Up
ENSG00000151062	CACNA2D4	3.949×10⁻²⁰	2.00134	Up
ENSG00000151117	TMEM86A	1.837×10⁻⁹	0.639407	Up
ENSG00000151150	ANK3	2.329×10⁻⁵	1.126	Up
ENSG00000151320	AKAP6	4.334×10⁻⁴	0.746654	Up
ENSG00000151414	NEK7	6.502×10⁻⁴⁸	0.90035	Up
ENSG00000151623	NR3C2	4.16×10⁻⁷	0.919402	Up
ENSG00000151651	ADAM8	4.745×10⁻¹⁴	1.72124	Up
ENSG00000151726	ACSL1	2.361×10⁻¹⁴	0.745202	Up
ENSG00000151790	TDO2	3.627×10⁻¹⁶⁹	2.37486	Up
ENSG00000152049	KCNE4	1.222×10⁻³	1.13184	Up
ENSG00000152061	RABGAP1L	1.035×10⁻²⁰	0.981598	Up
ENSG00000152763	WDR78	2.922×10⁻⁵	0.770105	Up
ENSG00000152977	ZIC1	3.051×10⁻³	0.745564	Up
ENSG00000153234	NR4A2	1.829×10⁻²	0.683285	Up
ENSG00000153531	ADPRHL1	1.58×10⁻⁹	1.28942	Up
ENSG00000153822	KCNJ16	4.354×10⁻²⁴	1.45655	Up
ENSG00000153823	PID1	1.344×10⁻⁴²	1.56523	Up
ENSG00000153976	HS3ST3A1	1.432×10⁻³³	0.786271	Up
ENSG00000154122	ANKH	3.092×10⁻³³	1.14946	Up
ENSG00000154165	GPR15	7.843×10⁻⁹	1.371	Up
ENSG00000154305	MIA3	2.562×10⁻²²	0.588061	Up
ENSG00000154309	DISP1	3.37×10⁻⁶	0.677073	Up
ENSG00000154359	LONRF1	3.911×10⁻⁴	0.680929	Up
ENSG00000154589	LY96	1.111×10⁻²	0.588818	Up
ENSG00000154678	PDE1C	0	2.65082	Up
ENSG00000155111	CDK19	1.36×10⁻²¹	0.679843	Up
ENSG00000155254	MARVELD1	2.93×10⁻⁵⁶	2.18328	Up
ENSG00000155465	SLC7A7	5.598×10⁻³	0.954597	Up
ENSG00000155849	ELMO1	1.462×10⁻⁹	1.33474	Up
ENSG00000155897	ADCY8	3.028×10⁻²²	1.04563	Up
ENSG00000156009	MAGEA8	1.052×10⁻²	1.14872	Up
ENSG00000156011	PSD3	1.616×10⁻²⁰	0.844662	Up
ENSG00000156162	DPY19L4	5.541×10⁻¹²	0.646533	Up
ENSG00000156265	MAP3K7CL	1.803×10⁻²	0.691598	Up
ENSG00000156273	BACH1	2.04×10⁻¹⁷	0.692189	Up
ENSG00000156515	HK1	4.704×10⁻⁵	1.33349	Up
ENSG00000156521	TYSND1	1.667×10⁻¹⁸	0.749169	Up
ENSG00000156711	MAPK13	2.029×10⁻¹²	0.675785	Up
ENSG00000156804	FBXO32	1.384×10⁻³¹	0.793378	Up
ENSG00000157064	NMNAT2	9.164×10⁻³⁵	3.90614	Up
ENSG00000157227	MMP14	1.213×10⁻³⁹	1.0608	Up
ENSG00000157423	HYDIN	9.25×10⁻⁸	0.779188	Up
ENSG00000157551	KCNJ15	5.117×10⁻¹⁶⁷	1.78242	Up
ENSG00000157613	CREB3L1	1.766×10⁻⁴	0.707381	Up
ENSG00000157657	ZNF618	4.48×10⁻³	0.641812	Up
ENSG00000157764	BRAF	1.75×10⁻¹¹	0.602515	Up
ENSG00000157833	GAREM2	1.598×10⁻⁷	0.824402	Up
ENSG00000157873	TNFRSF14	3.391×10⁻¹⁷	0.799089	Up
ENSG00000158186	MRAS	2.538×10⁻⁴⁸	1.57444	Up
ENSG00000158292	GPR153	7.555×10⁻⁴	0.625131	Up
ENSG00000158373	HIST1H2BD	1.775×10⁻⁴³	1.79911	Up
ENSG00000158406	HIST1H4H	4.948×10⁻¹¹	1.98295	Up
ENSG00000158467	AHCYL2	2.427×10⁻¹³	0.667964	Up
ENSG00000158711	ELK4	9.811×10⁻¹⁵	0.598216	Up
ENSG00000158747	NBL1	4.48×10⁻¹¹	1.40362	Up
ENSG00000158792	SPATA2L	3.732×10⁻¹¹	0.780521	Up
ENSG00000159217	IGF2BP1	9.14×10⁻⁶	1.27141	Up
ENSG00000159450	TCHH	9.245×10⁻⁴	1.29418	Up
ENSG00000159674	SPON2	1.095×10⁻²⁰⁶	3.46066	Up
ENSG00000159714	ZDHHC1	2.224×10⁻²	0.778736	Up
ENSG00000159733	ZFYVE28	1.135×10⁻¹⁸	1.72654	Up
ENSG00000159761	C16orf86	6.544×10⁻⁵	1.16723	Up
ENSG00000160113	NR2F6	4.287×10⁻³³	0.967729	Up
ENSG00000160190	SLC37A1	7.352×10⁻¹⁷	3.62924	Up
ENSG00000160285	LSS	1.628×10⁻⁵⁶	0.78591	Up
ENSG00000160323	ADAMTS13	7.41×10⁻⁹	2.22522	Up
ENSG00000160325	CACFD1	4.907×10⁻¹²	0.862585	Up
ENSG00000160326	SLC2A6	2.138×10⁻⁵	0.977923	Up
ENSG00000160445	ZER1	2.312×10⁻²⁵	0.750033	Up
ENSG00000160752	FDPS	2.431×10⁻⁵¹	0.778681	Up
ENSG00000160767	FAM189B	8.567×10⁻¹⁸	0.588731	Up
ENSG00000160781	PAQR6	3.025×10⁻¹⁰	1.7805	Up
ENSG00000160801	PTH1R	5.272×10⁻⁴	0.847875	Up
ENSG00000161677	JOSD2	6.052×10⁻¹¹	0.869879	Up
ENSG00000161835	GRASP	4.415×10⁻³	0.866417	Up
ENSG00000161939	RNASEK-C17orf49	3.659×10⁻²	1.07922	Up
ENSG00000162004	CCDC78	1.487×10⁻¹⁷	0.97459	Up
ENSG00000162032	SPSB3	6.193×10⁻¹⁹	0.783786	Up
ENSG00000162415	ZSWIM5	4.221×10⁻³	0.976438	Up
ENSG00000162512	SDC3	5.266×10⁻²³	0.972676	Up
ENSG00000162545	CAMK2N1	6.01×10⁻³²	0.825698	Up
ENSG00000162572	SCNN1D	1.857×10⁻⁵	1.14167	Up
ENSG00000162576	MXRA8	4.457×10⁻⁹⁴	2.16134	Up
ENSG00000162706	CADM3	3.17×10⁻⁷	1.14726	Up
ENSG00000162714	ZNF496	4.494×10⁻²⁹	0.636318	Up
ENSG00000162733	DDR2	1.947×10⁻⁴⁴	0.674379	Up
ENSG00000162804	SNED1	1.299×10⁻²	0.690549	Up
ENSG00000162814	SPATA17	1.991×10⁻⁴	0.596872	Up
ENSG00000162976	PQLC3	6.284×10⁻⁵	0.88866	Up
ENSG00000163013	FBXO41	1.224×10⁻²⁶	0.843294	Up
ENSG00000163040	CCDC74A	9.63×10⁻³	0.658955	Up
ENSG00000163346	PBXIP1	2.295×10⁻⁹¹	1.21409	Up
ENSG00000163395	IGFN1	6.415×10⁻²⁵⁸	2.46261	Up
ENSG00000163449	TMEM169	3.031×10⁻⁴	0.864603	Up
ENSG00000163453	IGFBP7	6.392×10⁻³⁴	0.731208	Up
ENSG00000163584	RPL22L1	4.275×10⁻³	0.702843	Up
ENSG00000163683	SMIM14	2.054×10⁻³⁷	1.1785	Up
ENSG00000163701	IL17RE	4.142×10⁻⁷	1.09389	Up
ENSG00000163794	UCN	1.122×10⁻⁴	0.929128	Up
ENSG00000163795	ZNF513	7.08×10⁻¹⁵	0.767327	Up
ENSG00000163879	DNALI1	1.078×10⁻⁹	0.709103	Up
ENSG00000163932	PRKCD	9.368×10⁻⁷	0.59687	Up
ENSG00000163945	UVSSA	6.369×10⁻¹⁴	0.706456	Up
ENSG00000164061	BSN	9.957×10⁻⁴	1.00553	Up
ENSG00000164099	PRSS12	1.986×10⁻⁶	0.796549	Up
ENSG00000164125	FAM198B	4.965×10⁻⁵³	1.30953	Up
ENSG00000164128	NPY1R	3.523×10⁻²	0.647721	Up
ENSG00000164211	STARD4	6.994×10⁻²³	0.721398	Up
ENSG00000164220	F2RL2	4.333×10⁻⁵	0.832386	Up
ENSG00000164330	EBF1	1.16×10⁻²	0.633733	Up
ENSG00000164379	FOXQ1	1.941×10⁻¹⁹	1.28213	Up
ENSG00000164440	TXLNB	3.178×10⁻⁸	1.32421	Up
ENSG00000164463	CREBRF	2.554×10⁻²⁷	1.41631	Up
ENSG00000164603	BMT2	2.174×10⁻¹⁵	0.867349	Up
ENSG00000164604	GPR85	2.825×10⁻¹³	0.954196	Up
ENSG00000164615	CAMLG	9.387×10⁻¹⁹	0.70625	Up
ENSG00000164619	BMPER	2.162×10⁻³	0.616111	Up
ENSG00000164638	SLC29A4	6.238×10⁻²³	0.975115	Up
ENSG00000164707	SLC13A4	1.038×10⁻²	0.676801	Up
ENSG00000164756	SLC30A8	3.731×10⁻⁵	0.81951	Up
ENSG00000164761	TNFRSF11B	1.821×10⁻¹⁵	1.10633	Up
ENSG00000164796	CSMD3	1.396×10⁻¹⁰	0.594511	Up
ENSG00000164849	GPR146	8.61×10⁻⁷	1.07275	Up
ENSG00000164850	GPER1	6.38×10⁻⁹	1.02103	Up
ENSG00000164938	TP53INP1	1.206×10⁻¹⁵	1.30219	Up
ENSG00000164951	PDP1	1.526×10⁻³⁸	1.18968	Up
ENSG00000165028	NIPSNAP3B	5.496×10⁻³	0.64075	Up
ENSG00000165102	HGSNAT	3.018×10⁻³⁰	0.904795	Up
ENSG00000165115	KIF27	3.583×10⁻⁴	0.629213	Up
ENSG00000165240	ATP7A	2.123×10⁻²⁶	1.20715	Up
ENSG00000165269	AQP7	6.346×10⁻⁴	1.14942	Up
ENSG00000165288	BRWD3	1.489×10⁻¹³	0.672895	Up
ENSG00000165312	OTUD1	5.772×10⁻⁴	1.28764	Up
ENSG00000165338	HECTD2	1.478×10⁻¹⁶	0.782878	Up
ENSG00000165379	LRFN5	1.529×10⁻⁷	0.616116	Up
ENSG00000165424	ZCCHC24	4.363×10⁻¹⁷	0.738587	Up
ENSG00000165449	SLC16A9	3.157×10⁻²²	1.59748	Up
ENSG00000165475	CRYL1	6.341×10⁻⁴	0.654896	Up
ENSG00000165507	DEPP1	5.377×10⁻⁶	0.717409	Up
ENSG00000165516	KLHDC2	3.525×10⁻²⁷	0.8806	Up
ENSG00000165617	DACT1	1.116×10⁻¹¹	1.76258	Up
ENSG00000165626	BEND7	2.984×10⁻¹³	0.778575	Up
ENSG00000165879	FRAT1	4.202×10⁻¹⁰	1.37087	Up
ENSG00000166033	HTRA1	4.581×10⁻⁴³	1.11363	Up
ENSG00000166046	TCP11L2	2.017×10⁻¹⁴	1.05437	Up
ENSG00000166073	GPR176	4.315×10⁻¹²	0.640323	Up
ENSG00000166169	POLL	4.17×10⁻²¹	0.592146	Up
ENSG00000166189	HPS6	1.615×10⁻¹¹	0.604677	Up
ENSG00000166206	GABRB3	4.645×10⁻⁹	1.00205	Up
ENSG00000166272	WBP1L	7.391×10⁻²⁶	0.675306	Up
ENSG00000166387	PPFIBP2	1.921×10⁻³	1.16162	Up
ENSG00000166396	SERPINB7	5.808×10⁻¹⁰	0.830318	Up
ENSG00000166546	BEAN1	8.836×10⁻¹¹	1.82082	Up
ENSG00000166689	PLEKHA7	1.181×10⁻²⁵	0.904689	Up
ENSG00000166734	CASC4	4.686×10⁻³⁵	0.725705	Up
ENSG00000166793	YPEL4	7.276×10⁻⁵	1.45959	Up
ENSG00000166922	SCG5	1.351×10⁻³⁵	0.815332	Up
ENSG00000167011	NAT16	1.814×10⁻¹⁰	0.950611	Up
ENSG00000167123	CERCAM	7.×10⁻⁵⁵	1.04076	Up
ENSG00000167131	CCDC103	3.33×10⁻⁵	0.773437	Up
ENSG00000167371	PRRT2	2.106×10⁻⁶	0.623049	Up
ENSG00000167508	MVD	2.4×10⁻⁶³	0.932244	Up
ENSG00000167535	CACNB3	7.255×10⁻¹⁵	0.588053	Up
ENSG00000167543	TP53I13	1.019×10⁻⁵	0.689992	Up
ENSG00000167565	SERTAD3	3.839×10⁻¹⁸	0.801674	Up
ENSG00000167588	GPD1	2.48×10⁻⁹	0.916747	Up
ENSG00000167632	TRAPPC9	1.68×10⁻¹¹	0.826454	Up
ENSG00000167705	RILP	2.026×10⁻¹³	0.787923	Up
ENSG00000167733	HSD11B1L	4.388×10⁻⁸	1.16897	Up
ENSG00000167895	TMC8	1.94×10⁻³	0.875979	Up
ENSG00000168056	LTBP3	1.182×10⁻⁴⁷	0.77699	Up
ENSG00000168062	BATF2	5.881×10⁻³	0.633741	Up
ENSG00000168077	SCARA3	2.511×10⁻¹⁶	1.05199	Up
ENSG00000168264	IRF2BP2	5.336×10⁻⁴²	0.717208	Up
ENSG00000168461	RAB31	1.508×10⁻²	0.856122	Up
ENSG00000168528	SERINC2	1.877×10⁻⁸¹	1.08292	Up
ENSG00000168679	SLC16A4	1.337×10⁻⁷	2.18078	Up
ENSG00000168702	LRP1B	1.643×10⁻⁵	1.15833	Up
ENSG00000168772	CXXC4	8.74×10⁻¹²	1.26855	Up
ENSG00000168785	TSPAN5	2.833×10⁻¹⁶	1.36933	Up
ENSG00000168890	TMEM150A	1.96×10⁻³⁹	1.14125	Up
ENSG00000168936	TMEM129	8.464×10⁻¹⁷	0.5876	Up
ENSG00000168994	PXDC1	4.219×10⁻²²	0.619737	Up
ENSG00000169026	SLC49A3	8.07×10⁻⁵	1.40196	Up
ENSG00000169084	DHRSX	1.04×10⁻⁹	0.89526	Up
ENSG00000169184	MN1	1.308×10⁻²⁶	0.858846	Up
ENSG00000169231	THBS3	1.57×10⁻⁷¹	1.29236	Up
ENSG00000169554	ZEB2	1.433×10⁻⁷	0.676473	Up
ENSG00000169891	REPS2	9.34×10⁻⁴	0.896663	Up
ENSG00000169967	MAP3K2	2.401×10⁻¹⁸	0.614583	Up
ENSG00000169992	NLGN2	4.506×10⁻³⁹	0.888835	Up
ENSG00000170085	SIMC1	1.34×10⁻¹⁴	2.28278	Up
ENSG00000170222	ADPRM	6.071×10⁻¹⁰	1.01106	Up
ENSG00000170271	FAXDC2	1.783×10⁻⁵	0.721309	Up
ENSG00000170345	FOS	9.202×10⁻⁴	1.21064	Up
ENSG00000170442	KRT86	1.406×10⁻¹²	1.09755	Up
ENSG00000170634	ACYP2	2.22×10⁻⁴	0.826872	Up
ENSG00000170667	RASA4B	2.436×10⁻⁴	1.70871	Up
ENSG00000170745	KCNS3	4.981×10⁻¹⁶	0.796177	Up
ENSG00000170775	GPR37	1.122×10⁻⁴¹	1.66657	Up
ENSG00000170961	HAS2	2.958×10⁻²	0.736668	Up
ENSG00000171045	TSNARE1	5.809×10⁻⁸	1.1487	Up
ENSG00000171105	INSR	4.595×10⁻⁹	0.715964	Up
ENSG00000171189	GRIK1	4.559×10⁻²	0.759117	Up
ENSG00000171206	TRIM8	5.852×10⁻⁶⁵	0.839689	Up
ENSG00000171223	JUNB	5.081×10⁻²⁶	0.934565	Up
ENSG00000171425	ZNF581	6.957×10⁻⁷³	1.05429	Up
ENSG00000171443	ZNF524	1.051×10⁻²³	0.866804	Up
ENSG00000171467	ZNF318	2.335×10⁻¹⁰	0.619176	Up
ENSG00000171649	ZIK1	9.907×10⁻⁵	1.40163	Up
ENSG00000171703	TCEA2	7.155×10⁻³⁵	0.90902	Up
ENSG00000171759	PAH	1.119×10⁻⁶	1.74594	Up
ENSG00000171858	RPS21	4.187×10⁻³	0.733067	Up
ENSG00000171885	AQP4	1.077×10⁻²	0.698285	Up
ENSG00000171951	SCG2	2.969×10⁻²⁸	2.82878	Up
ENSG00000171962	DRC3	3.847×10⁻⁶	1.59568	Up
ENSG00000171992	SYNPO	1.169×10⁻⁵	0.608223	Up
ENSG00000172086	KRCC1	8.717×10⁻¹¹	0.604812	Up
ENSG00000172137	CALB2	3.947×10⁻¹²	2.5328	Up
ENSG00000172260	NEGR1	1.054×10⁻²¹	1.25463	Up
ENSG00000172458	IL17D	2.493×10⁻²	0.812341	Up
ENSG00000172476	RAB40A	1.161×10⁻²	0.807807	Up
ENSG00000172638	EFEMP2	6.295×10⁻⁴	1.1257	Up
ENSG00000172893	DHCR7	1.881×10⁻⁷⁹	0.837102	Up
ENSG00000172901	LVRN	2.821×10⁻⁶	0.58654	Up
ENSG00000172915	NBEA	1.011×10⁻⁸	0.597123	Up
ENSG00000173156	RHOD	6.109×10⁻¹³	0.901974	Up
ENSG00000173227	SYT12	2.771×10⁻²	0.670589	Up
ENSG00000173267	SNCG	2.058×10⁻¹⁷	2.04002	Up
ENSG00000173273	TNKS	1.132×10⁻¹¹	0.635043	Up
ENSG00000173432	SAA1	1.205×10⁻¹²	1.44732	Up
ENSG00000173451	THAP2	9.424×10⁻⁷	0.955493	Up
ENSG00000173452	TMEM196	2.056×10⁻⁷	0.850949	Up
ENSG00000173531	MST1	4.172×10⁻¹⁴	1.56017	Up
ENSG00000173818	ENDOV	1.997×10⁻¹⁰	0.710221	Up
ENSG00000173926	37681	8.62×10⁻¹¹	0.893423	Up
ENSG00000173991	TCAP	3.66×10⁻²	0.58812	Up
ENSG00000174327	SLC16A13	2.022×10⁻¹²	0.905425	Up
ENSG00000174428	GTF2IRD2B	1.069×10⁻¹⁶	1.408	Up
ENSG00000174514	MFSD4A	5.217×10⁻³	0.968702	Up
ENSG00000174521	TTC9B	1.867×10⁻²	0.694619	Up
ENSG00000174529	TMEM81	2.089×10⁻²	0.613677	Up
ENSG00000174938	SEZ6L2	1.779×10⁻⁴¹	0.873598	Up
ENSG00000174989	FBXW8	1.343×10⁻¹⁸	0.619556	Up
ENSG00000175155	YPEL2	1.396×10⁻¹⁰	0.872072	Up
ENSG00000175161	CADM2	7.153×10⁻⁵	0.999086	Up
ENSG00000175600	SUGCT	8.979×10⁻⁵	0.696136	Up
ENSG00000175938	ORAI3	2.956×10⁻⁸⁵	1.57034	Up
ENSG00000176058	TPRN	1.545×10⁻²¹	0.771102	Up
ENSG00000176125	UFSP1	1.633×10⁻⁵	0.709471	Up
ENSG00000176209	SMIM19	2.285×10⁻⁶	0.643804	Up
ENSG00000176222	ZNF404	1.8×10⁻³	0.976027	Up
ENSG00000176463	SLCO3A1	7.21×10⁻²⁵	4.02378	Up
ENSG00000176658	MYO1D	1.896×10⁻²⁸	1.6178	Up
ENSG00000176697	BDNF	1.061×10⁻¹⁸	0.76745	Up
ENSG00000176771	NCKAP5	4.3×10⁻⁴	1.04763	Up
ENSG00000176907	TCIM	3.939×10⁻¹³	1.03062	Up
ENSG00000176928	GCNT4	2.669×10⁻⁹	0.793378	Up
ENSG00000177000	MTHFR	3.477×10⁻²⁰	0.697979	Up
ENSG00000177427	MIEF2	4.637×10⁻⁶	0.592651	Up
ENSG00000177675	CD163L1	2.593×10⁻¹¹	1.87565	Up
ENSG00000177706	FAM20C	7.108×10⁻²⁵	4.33035	Up
ENSG00000177854	TMEM187	2.482×10⁻⁸	1.12938	Up
ENSG00000178031	ADAMTSL1	3.173×10⁻¹³	0.586217	Up
ENSG00000178038	ALS2CL	1.052×10⁻⁶	1.92797	Up
ENSG00000178234	GALNT11	1.666×10⁻¹⁵	0.614292	Up
ENSG00000178386	ZNF223	4.545×10⁻⁴	0.589682	Up
ENSG00000178460	MCMDC2	8.619×10⁻⁴	1.06204	Up
ENSG00000178467	P4HTM	1.901×10⁻⁶	0.595766	Up
ENSG00000178498	DTX3	2.957×10⁻⁵⁶	3.06175	Up
ENSG00000178568	ERBB4	3.009×10⁻²	0.644974	Up
ENSG00000178726	THBD	7.72×10⁻¹⁸	1.64472	Up
ENSG00000178814	OPLAH	2.429×10⁻¹⁸	0.879288	Up
ENSG00000178860	MSC	6.581×10⁻⁶⁶	1.67574	Up
ENSG00000179071	CCDC89	8.16×10⁻³	0.907626	Up
ENSG00000179094	PER1	5.176×10⁻⁶	0.604522	Up
ENSG00000179292	TMEM151A	3.547×10⁻²	0.585797	Up
ENSG00000179454	KLHL28	2.143×10⁻⁸	0.766509	Up
ENSG00000179532	DNHD1	2.156×10⁻¹⁸	0.826434	Up
ENSG00000179715	PCED1B	2.052×10⁻³⁷	1.06136	Up
ENSG00000179772	FOXS1	1.669×10⁻²⁴	2.47397	Up
ENSG00000179820	MYADM	1.203×10⁻⁸⁹	3.34396	Up
ENSG00000179886	TIGD5	4.289×10⁻¹⁰	0.794227	Up
ENSG00000179954	SSC5D	2.066×10⁻⁶	1.18855	Up
ENSG00000179981	TSHZ1	1.806×10⁻⁹	1.01055	Up
ENSG00000180035	ZNF48	4.669×10⁻¹⁹	0.801452	Up
ENSG00000180210	F2	3.073×10⁻⁵	1.18727	Up
ENSG00000180573	HIST1H2AC	2.814×10⁻⁹⁰	1.77332	Up
ENSG00000180938	ZNF572	8.624×10⁻⁵	0.714088	Up
ENSG00000180953	ST20	1.302×10⁻²	0.602882	Up
ENSG00000181004	BBS12	4.964×10⁻⁷	0.971885	Up
ENSG00000181274	FRAT2	2.271×10⁻¹⁶	0.825147	Up
ENSG00000181284	TMEM102	5.734×10⁻¹⁰	0.823117	Up
ENSG00000181392	SYNE4	4.906×10⁻³	0.852251	Up
ENSG00000181418	DDN	4.02×10⁻¹⁴	0.891243	Up
ENSG00000181634	TNFSF15	1.467×10⁻¹⁶	1.20313	Up
ENSG00000181690	PLAG1	1.475×10⁻⁷	0.822972	Up
ENSG00000182022	CHST15	2.408×10⁻¹⁷	0.789115	Up
ENSG00000182195	LDOC1	3.091×10⁻³²	3.4575	Up
ENSG00000182253	SYNM	1.209×10⁻¹⁸	0.772067	Up
ENSG00000182256	GABRG3	2.112×10⁻¹⁴	2.74246	Up
ENSG00000182324	KCNJ14	3.681×10⁻³	0.803239	Up
ENSG00000182372	CLN8	3.743×10⁻⁷	0.784789	Up
ENSG00000182379	NXPH4	1.566×10⁻⁵	0.790464	Up
ENSG00000182568	SATB1	9.416×10⁻²¹	1.54095	Up
ENSG00000182584	ACTL10	1.772×10⁻⁶	0.962259	Up
ENSG00000182791	CCDC87	3.178×10⁻²	0.719031	Up
ENSG00000182809	CRIP2	1.576×10⁻¹⁰⁷	1.916	Up
ENSG00000183087	GAS6	2.229×10⁻⁶⁸	1.1618	Up
ENSG00000183092	BEGAIN	8.807×10⁻⁶	1.37178	Up
ENSG00000183098	GPC6	1.56×10⁻²²	0.616245	Up
ENSG00000183117	CSMD1	5.308×10⁻³	0.634179	Up
ENSG00000183246	RIMBP3C	2.326×10⁻²	0.59587	Up
ENSG00000183401	CCDC159	1.929×10⁻³	0.665923	Up
ENSG00000183570	PCBP3	2.061×10⁻⁷	1.73149	Up
ENSG00000183723	CMTM4	2.89×10⁻¹¹	0.61517	Up
ENSG00000183779	ZNF703	1.098×10⁻⁶⁷	2.15053	Up
ENSG00000183876	ARSI	5.045×10⁻¹¹	2.12993	Up
ENSG00000184056	VPS33B	2.396×10⁻⁷	1.074	Up
ENSG00000184194	GPR173	1.682×10⁻⁴	0.775896	Up
ENSG00000184363	PKP3	1.259×10⁻⁹	1.10455	Up
ENSG00000184481	FOXO4	7.128×10⁻⁵	0.822559	Up
ENSG00000184497	TMEM255B	4.19×10⁻⁸	1.72295	Up
ENSG00000184613	NELL2	2.321×10⁻⁴	0.82563	Up
ENSG00000184675	AMER1	4.765×10⁻²	0.714342	Up
ENSG00000184678	HIST2H2BE	2.954×10⁻²³	1.70876	Up
ENSG00000184731	FAM110C	5.459×10⁻³	0.807047	Up
ENSG00000184922	FMNL1	3.963×10⁻⁵	0.767954	Up
ENSG00000185010	F8	3.335×10⁻⁶	0.866827	Up
ENSG00000185070	FLRT2	4.076×10⁻³⁸	1.14071	Up
ENSG00000185250	PPIL6	2.106×10⁻¹⁰	1.447	Up
ENSG00000185261	KIAA0825	2.129×10⁻²	0.710102	Up
ENSG00000185499	MUC1	9.923×10⁻⁶	0.761582	Up
ENSG00000185519	FAM131C	1.733×10⁻²	0.76931	Up
ENSG00000185561	TLCD2	1.661×10⁻⁶	1.21272	Up
ENSG00000185585	OLFML2A	1.926×10⁻¹⁵	0.641686	Up
ENSG00000185630	PBX1	5.875×10⁻⁴⁸	1.10283	Up
ENSG00000185737	NRG3	3.278×10⁻²	0.754622	Up
ENSG00000185862	EVI2B	2.485×10⁻³	1.33793	Up
ENSG00000185909	KLHDC8B	1.403×10⁻¹³	0.902938	Up
ENSG00000185920	PTCH1	1.488×10⁻⁴⁵	1.30181	Up
ENSG00000186026	ZNF284	8.488×10⁻⁸	0.632201	Up
ENSG00000186086	NBPF6	4.805×10⁻³	0.69621	Up
ENSG00000186222	BLOC1S4	3.445×10⁻⁹	0.666053	Up
ENSG00000186318	BACE1	6.34×10⁻³⁴	0.92369	Up
ENSG00000186376	ZNF75D	1.312×10⁻⁵	0.800238	Up
ENSG00000186472	PCLO	1.337×10⁻⁹⁰	1.02833	Up
ENSG00000186480	INSIG1	6.78×10⁻⁷³	0.872054	Up
ENSG00000186567	CEACAM19	5.426×10⁻⁴	0.662702	Up
ENSG00000186642	PDE2A	2.232×10⁻³	1.03934	Up
ENSG00000186814	ZSCAN30	3.504×10⁻⁴	0.662556	Up
ENSG00000186854	TRABD2A	7.774×10⁻⁸	1.07413	Up
ENSG00000186862	PDZD7	6.374×10⁻⁶	1.25271	Up
ENSG00000186951	PPARA	3.113×10⁻²⁵	0.940324	Up
ENSG00000186952	TMEM232	2.972×10⁻³	0.86024	Up
ENSG00000187091	PLCD1	4.267×10⁻³	0.651104	Up
ENSG00000187266	EPOR	1.199×10⁻⁵	0.60156	Up
ENSG00000187535	IFT140	5.287×10⁻²³	0.719056	Up
ENSG00000187634	SAMD11	1.049×10⁻²⁸	1.42188	Up
ENSG00000187650	VMAC	1.373×10⁻³	0.980522	Up
ENSG00000187688	TRPV2	1.932×10⁻⁴	0.598439	Up
ENSG00000187824	TMEM220	1.69×10⁻⁴	1.34818	Up
ENSG00000187837	HIST1H1C	7.454×10⁻⁷⁵	1.67577	Up
ENSG00000187957	DNER	5.343×10⁻⁷⁷	3.34566	Up
ENSG00000187994	RINL	3.501×10⁻²	0.714707	Up
ENSG00000188177	ZC3H6	4.973×10⁻¹⁶	1.51091	Up
ENSG00000188243	COMMD6	1.488×10⁻⁸	0.69977	Up
ENSG00000188581	KRTAP1-1	6.452×10⁻³	0.694152	Up
ENSG00000188732	FAM221A	3.559×10⁻⁸	0.651886	Up
ENSG00000188747	NOXA1	4.314×10⁻⁵	1.20729	Up
ENSG00000188818	ZDHHC11	1.179×10⁻¹⁴	1.58121	Up
ENSG00000188859	FAM78B	8.13×10⁻⁶	1.42403	Up
ENSG00000189143	CLDN4	3.203×10⁻⁵¹	2.05078	Up
ENSG00000189283	FHIT	7.709×10⁻⁴	0.895367	Up
ENSG00000189369	GSPT2	3.218×10⁻⁶	0.604381	Up
ENSG00000196110	ZNF699	3.382×10⁻²	0.720669	Up
ENSG00000196208	GREB1	2.694×10⁻⁴	1.28669	Up
ENSG00000196345	ZKSCAN7	4.282×10⁻³	0.879153	Up
ENSG00000196378	ZNF34	2.867×10⁻⁴	0.700521	Up
ENSG00000196482	ESRRG	1.026×10⁻⁴	0.817235	Up
ENSG00000196544	BORCS6	8.785×10⁻¹⁶	0.854596	Up
ENSG00000196636	SDHAF3	5.792×10⁻¹⁴	1.70349	Up
ENSG00000196683	TOMM7	1.3×10⁻⁴	0.951487	Up
ENSG00000196787	HIST1H2AG	2.431×10⁻⁴	0.929372	Up
ENSG00000196878	LAMB3	1.204×10⁻⁶⁴	1.42944	Up
ENSG00000196998	WDR45	9.456×10⁻¹⁸	0.723727	Up
ENSG00000197183	NOL4L	1.922×10⁻³⁷	0.811781	Up
ENSG00000197329	PELI1	1.71×10⁻⁴	0.602081	Up
ENSG00000197363	ZNF517	2.464×10⁻⁴	0.659221	Up
ENSG00000197410	DCHS2	8.134×10⁻⁵	1.49022	Up
ENSG00000197444	OGDHL	2.058×10⁻²²	1.93899	Up
ENSG00000197457	STMN3	4.743×10⁻³	0.592636	Up
ENSG00000197461	PDGFA	2.495×10⁻³	0.902911	Up
ENSG00000197763	TXNRD3	2.457×10⁻⁵	1.00808	Up
ENSG00000197841	ZNF181	4.317×10⁻⁸	0.806904	Up
ENSG00000197903	HIST1H2BK	6.102×10⁻³⁷	1.38529	Up
ENSG00000197959	DNM3	8.663×10⁻¹⁹	1.1824	Up
ENSG00000198003	CCDC151	9.487×10⁻⁴	0.993533	Up
ENSG00000198185	ZNF334	2.933×10⁻²	0.661269	Up
ENSG00000198205	ZXDA	1.257×10⁻³	0.646556	Up
ENSG00000198517	MAFK	7.709×10⁻⁴³	0.844801	Up
ENSG00000198756	COLGALT2	2.482×10⁻⁵	0.590438	Up
ENSG00000198768	APCDD1L	2.355×10⁻²⁴⁷	2.79008	Up
ENSG00000198816	ZNF358	3.345×10⁻⁴	0.74781	Up
ENSG00000198829	SUCNR1	1.626×10⁻²⁴	3.14286	Up
ENSG00000198839	ZNF277	4.293×10⁻²³	0.648438	Up
ENSG00000198892	SHISA4	8.864×10⁻²²	0.955726	Up
ENSG00000198959	TGM2	5.113×10⁻¹⁰²	0.901616	Up
ENSG00000203724	C1orf53	4.777×10⁻³	0.591242	Up
ENSG00000203780	FANK1	5.132×10⁻⁶	0.949509	Up
ENSG00000203811	HIST2H3C	8.674×10⁻⁵	1.31929	Up
ENSG00000203812	HIST2H2AA3	8.122×10⁻²³	1.79411	Up
ENSG00000203837	PNLIPRP3	2.39×10⁻¹⁸	3.3259	Up
ENSG00000203852	HIST2H3A	5.691×10⁻⁵	1.17164	Up
ENSG00000204052	LRRC73	1.298×10⁻⁷	1.58525	Up
ENSG00000204128	C2orf72	2.847×10⁻¹⁰	0.616716	Up
ENSG00000204161	TMEM273	3.166×10⁻⁸	1.80778	Up
ENSG00000204291	COL15A1	2.011×10⁻⁵	1.05469	Up
ENSG00000204387	C6orf48	2.962×10⁻¹³	0.69572	Up
ENSG00000204442	FAM155A	7.682×10⁻⁹	0.717576	Up
ENSG00000204498	NFKBIL1	2.258×10⁻¹⁹	0.713402	Up
ENSG00000204580	DDR1	9.431×10⁻³⁷	0.677305	Up
ENSG00000204618	RNF39	2.884×10⁻⁴	1.17844	Up
ENSG00000204682	CASC10	2.084×10⁻²²	0.912935	Up
ENSG00000204947	ZNF425	5.127×10⁻⁷	1.15826	Up
ENSG00000204991	SPIRE2	2.666×10⁻²⁷	0.771476	Up
ENSG00000205097	FRG2	6.215×10⁻⁵⁴	3.97535	Up
ENSG00000205269	TMEM170B	8.493×10⁻¹²	0.726353	Up
ENSG00000205309	NT5M	1.91×10⁻⁷	0.879684	Up
ENSG00000205426	KRT81	1.255×10⁻¹⁷	0.786558	Up
ENSG00000205560	CPT1B	2.266×10⁻⁶	0.588297	Up
ENSG00000205593	DENND6B	1.214×10⁻⁷	1.00041	Up
ENSG00000205808	PLPP6	3.781×10⁻¹¹	0.827004	Up
ENSG00000205903	ZNF316	2.884×10⁻²³	0.590334	Up
ENSG00000205978	NYNRIN	1.238×10⁻²	0.801177	Up
ENSG00000206538	VGLL3	2.229×10⁻¹⁵	3.0081	Up
ENSG00000213722	DDAH2	9.847×10⁻²⁰	0.623389	Up
ENSG00000213760	ATP6V1G2	2.561×10⁻²	0.887759	Up
ENSG00000213859	KCTD11	1.108×10⁻¹⁵	0.925426	Up
ENSG00000213889	PPM1N	2.796×10⁻⁵	1.0847	Up
ENSG00000214265	AC124312.1	1.585×10⁻²	0.725313	Up
ENSG00000214530	STARD10	2.964×10⁻¹⁰	0.666612	Up
ENSG00000214562	NUTM2D	1.22×10⁻²	0.799782	Up
ENSG00000214575	CPEB1	1.139×10⁻⁴	0.754582	Up
ENSG00000214595	EML6	7.754×10⁻⁵	0.864477	Up
ENSG00000215375	MYL5	1.354×10⁻¹³	0.966094	Up
ENSG00000215440	NPEPL1	5.643×10⁻⁹	0.672577	Up
ENSG00000215845	TSTD1	7.04×10⁻⁶	0.669078	Up
ENSG00000217555	CKLF	5.779×10⁻⁵	0.650401	Up
ENSG00000218891	ZNF579	1.676×10⁻²⁴	0.682716	Up
ENSG00000219626	FAM228B	6.418×10⁻⁴	1.35926	Up
ENSG00000221866	PLXNA4	5.786×10⁻⁸	1.20249	Up
ENSG00000222009	BTBD19	3.556×10⁻⁹	0.621138	Up
ENSG00000223572	CKMT1A	2.283×10⁻⁵	1.06681	Up
ENSG00000224982	TMEM233	1.332×10⁻¹¹	2.49476	Up
ENSG00000226887	ERVMER34-1	2.774×10⁻¹²	2.40508	Up
ENSG00000227234	SPANXB1	3.849×10⁻²⁵	3.82883	Up
ENSG00000231500	RPS18	5.8×10⁻¹⁸	0.591317	Up
ENSG00000232040	ZBED9	7.627×10⁻⁶	0.791367	Up
ENSG00000233822	HIST1H2BN	4.022×10⁻²	0.744109	Up
ENSG00000235109	ZSCAN31	6.025×10⁻⁴	0.73544	Up
ENSG00000235169	SMIM1	1.736×10⁻⁵	1.3138	Up
ENSG00000237441	RGL2	2.54×10⁻⁴²	0.843802	Up
ENSG00000237671	GAGE12C	1.323×10⁻²	0.932809	Up
ENSG00000239521	CASTOR3	1.833×10⁻³	0.611077	Up
ENSG00000239697	TNFSF12	1.093×10⁻⁴	0.926325	Up
ENSG00000240694	PNMA2	3.254×10⁻⁷	2.09392	Up
ENSG00000240764	PCDHGC5	1.512×10⁻³	2.2024	Up
ENSG00000243279	PRAF2	1.377×10⁻⁴	1.17501	Up
ENSG00000245848	CEBPA	8.277×10⁻⁹	0.736731	Up
ENSG00000248905	FMN1	2.502×10⁻¹⁵	0.889442	Up
ENSG00000249992	TMEM158	4.791×10⁻⁷	0.771604	Up
ENSG00000250510	GPR162	8.907×10⁻¹⁵	1.02401	Up
ENSG00000250571	GLI4	2.768×10⁻¹¹	0.597133	Up
ENSG00000251349	MSANTD3-TMEFF1	1.515×10⁻⁸	0.741971	Up
ENSG00000253304	TMEM200B	3.495×10⁻³	1.12966	Up
ENSG00000253537	PCDHGA7	5.934×10⁻⁶	1.00561	Up
ENSG00000253846	PCDHGA10	1.216×10⁻⁴	1.09647	Up
ENSG00000253873	PCDHGA11	1.681×10⁻⁶	2.25629	Up
ENSG00000254087	LYN	6.49×10⁻¹⁸	1.39365	Up
ENSG00000254221	PCDHGB1	9.167×10⁻⁴	0.86809	Up
ENSG00000254726	MEX3A	2.308×10⁻⁴⁹	1.19921	Up
ENSG00000255112	CHMP1B	5.714×10⁻⁴³	0.720245	Up
ENSG00000255339	AL133352.1	4.921×10⁻²	0.613772	Up
ENSG00000256029	AL590560.1	2.503×10⁻³	0.801453	Up
ENSG00000256043	CTSO	3.537×10⁻¹⁴	0.805176	Up
ENSG00000256980	KHDC1L	7.03×10⁻⁹	1.43982	Up
ENSG00000257524	AL157935.2	3.096×10⁻⁴	1.19611	Up
ENSG00000258839	MC1R	7.218×10⁻⁴	0.650787	Up
ENSG00000258947	TUBB3	3.942×10⁻⁴	0.591372	Up
ENSG00000259024	TVP23C-CDRT4	1.651×10⁻³	0.613329	Up
ENSG00000261221	ZNF865	1.547×10⁻²⁴	0.708179	Up
ENSG00000261371	PECAM1	2.509×10⁻³	1.0652	Up
ENSG00000261740	BOLA2-SMG1P6	4.064×10⁻²	0.718239	Up
ENSG00000261934	PCDHGA9	2.054×10⁻³	1.11158	Up
ENSG00000263155	MYZAP	2.057×10⁻²	0.637096	Up
ENSG00000263528	IKBKE	1.639×10⁻⁸	0.591662	Up
ENSG00000265690	AC074143.1	2.939×10⁻⁵	0.887301	Up
ENSG00000265972	TXNIP	5.671×10⁻⁹	0.80791	Up
ENSG00000266338	NBPF15	1.044×10⁻¹⁶	0.607817	Up
ENSG00000267060	PTGES3L	8.085×10⁻⁶	0.927715	Up
ENSG00000267221	C17orf113	7.605×10⁻³	0.970921	Up
ENSG00000270276	HIST2H4B	1.194×10⁻¹¹	1.08475	Up
ENSG00000270629	NBPF14	1.552×10⁻¹³	0.859819	Up
ENSG00000270882	HIST2H4A	4.4×10⁻⁴	1.52972	Up
ENSG00000271383	NBPF19	4.356×10⁻²⁷	0.611066	Up
ENSG00000272031	ANKRD34A	4.69×10⁻⁸	0.90598	Up
ENSG00000272196	HIST2H2AA4	1.109×10⁻¹⁸	1.48568	Up
ENSG00000272514	CFAP206	2.809×10⁻³	0.707217	Up
ENSG00000272899	ATP6V1FNB	5.898×10⁻⁷²	1.89085	Up
ENSG00000273604	EPOP	1.652×10⁻⁴	0.676508	Up
ENSG00000273706	LHX1	2.809×10⁻⁴	0.920093	Up
ENSG00000273802	HIST1H2BG	1.28×10⁻³	1.07811	Up
ENSG00000274750	HIST1H3E	1.142×10⁻¹⁴	1.44688	Up
ENSG00000274810	NPHP3-ACAD11	1.546×10⁻²	1.18826	Up
ENSG00000275183	LENG9	1.499×10⁻¹²	1.36258	Up
ENSG00000275395	FCGBP	9.067×10⁻²⁶	1.1029	Up
ENSG00000275793	RIMBP3	5.134×10⁻⁵	0.892862	Up
ENSG00000276180	HIST1H4I	3.419×10⁻¹²	1.20253	Up
ENSG00000277075	HIST1H2AE	2.849×10⁻²	0.752855	Up
ENSG00000277586	NEFL	1.485×10⁻²²	1.3181	Up
ENSG00000278828	HIST1H3H	2.87×10⁻⁶	1.09318	Up
ENSG00000282988	AL031777.3	4.13×10⁻⁴	1.08771	Up
ENSG00000283189	AC104452.1	1.03×10⁻⁵	1.29806	Up
ENSG00000284194	SCO2	1.577×10⁻³	1.31288	Up
ENSG00000284820	AC068946.2	1.147×10⁻²	0.743769	Up
ENSG00000285943	AC112128.1	5.986×10⁻³	0.647105	Up
Homo_sapiens_newGene_10007	--	3.189×10⁻³	0.969834	Up
Homo_sapiens_newGene_10036	--	1.197×10⁻²	0.817963	Up
Homo_sapiens_newGene_10221	--	5.105×10⁻¹⁵	1.19024	Up
Homo_sapiens_newGene_10235	--	4.323×10⁻²	0.631456	Up
Homo_sapiens_newGene_1030	--	3.843×10⁻⁴	0.975669	Up
Homo_sapiens_newGene_10383	--	5.328×10⁻³	0.914257	Up
Homo_sapiens_newGene_10585	--	7.244×10⁻⁵	4.14231	Up
Homo_sapiens_newGene_10650	--	2.949×10⁻¹¹	0.630652	Up
Homo_sapiens_newGene_10778	--	7.349×10⁻⁴	1.42957	Up
Homo_sapiens_newGene_10884	--	6.247×10⁻³	0.929102	Up
Homo_sapiens_newGene_11037	--	1.3×10⁻⁸	0.697917	Up
Homo_sapiens_newGene_11057	--	2.077×10⁻²	0.635733	Up
Homo_sapiens_newGene_11068	--	2.654×10⁻²	1.03927	Up
Homo_sapiens_newGene_11079	--	3.152×10⁻²	1.03218	Up
Homo_sapiens_newGene_11248	--	1.545×10⁻³	1.40282	Up
Homo_sapiens_newGene_11390	--	7.253×10⁻¹⁶	1.78841	Up
Homo_sapiens_newGene_11566	--	1.671×10⁻²	0.621059	Up
Homo_sapiens_newGene_11595	--	2.535×10⁻³	0.970816	Up
Homo_sapiens_newGene_11611	--	5.388×10⁻⁹	1.2589	Up
Homo_sapiens_newGene_11643	--	1.213×10⁻²	0.626776	Up
Homo_sapiens_newGene_11645	--	1.067×10⁻²	0.912671	Up
Homo_sapiens_newGene_11666	--	1.155×10⁻¹⁵	0.817165	Up
Homo_sapiens_newGene_11671	--	1.144×10⁻¹⁰	1.34695	Up
Homo_sapiens_newGene_11684	--	1.51×10⁻¹³	0.691286	Up
Homo_sapiens_newGene_11855	--	9.338×10⁻⁴	1.1636	Up
Homo_sapiens_newGene_12085	--	6.542×10⁻³	1.0033	Up
Homo_sapiens_newGene_12088	--	2.304×10⁻⁴	0.868391	Up
Homo_sapiens_newGene_12094	--	1.768×10⁻³	1.14576	Up
Homo_sapiens_newGene_12118	--	6.538×10⁻⁸	1.11366	Up
Homo_sapiens_newGene_12168	--	2.043×10⁻³	0.680876	Up
Homo_sapiens_newGene_12197	--	1.821×10⁻²	0.62125	Up
Homo_sapiens_newGene_12267	--	1.463×10⁻⁴	0.652372	Up
Homo_sapiens_newGene_12302	--	5.411×10⁻⁸	2.21345	Up
Homo_sapiens_newGene_12303	--	2.263×10⁻⁹	1.60544	Up
Homo_sapiens_newGene_12364	--	9.467×10⁻²⁰	2.65175	Up
Homo_sapiens_newGene_124	--	7.222×10⁻¹¹	1.17273	Up
Homo_sapiens_newGene_12522	--	2.586×10⁻⁴	1.31524	Up
Homo_sapiens_newGene_12562	--	3.452×10⁻³	0.704925	Up
Homo_sapiens_newGene_12611	--	2.212×10⁻²	0.640024	Up
Homo_sapiens_newGene_12624	--	5.175×10⁻³	0.7022	Up
Homo_sapiens_newGene_12670	--	8.769×10⁻⁴	1.05512	Up
Homo_sapiens_newGene_12849	--	6.728×10⁻³	0.725592	Up
Homo_sapiens_newGene_13035	--	9.423×10⁻⁵	1.23094	Up
Homo_sapiens_newGene_1315	--	1.106×10⁻⁴	0.629005	Up
Homo_sapiens_newGene_1316	--	1.856×10⁻⁶	1.23556	Up
Homo_sapiens_newGene_13306	--	5.844×10⁻⁴	0.923146	Up
Homo_sapiens_newGene_13385	--	2.067×10⁻⁹	1.93573	Up
Homo_sapiens_newGene_13592	--	1.129×10⁻⁴	1.10648	Up
Homo_sapiens_newGene_1362	--	1.246×10⁻⁴	1.08003	Up
Homo_sapiens_newGene_13622	--	3.326×10⁻⁶	0.738598	Up
Homo_sapiens_newGene_13636	--	1.145×10⁻⁴	0.602065	Up
Homo_sapiens_newGene_1368	--	2.499×10⁻²	0.638052	Up
Homo_sapiens_newGene_13797	--	1.928×10⁻¹⁰	1.60801	Up
Homo_sapiens_newGene_13817	--	1.431×10⁻³	1.12645	Up
Homo_sapiens_newGene_13914	--	8.01×10⁻⁹	1.12607	Up
Homo_sapiens_newGene_13986	--	4.519×10⁻²	0.711789	Up
Homo_sapiens_newGene_14013	--	5.174×10⁻¹³	0.876905	Up
Homo_sapiens_newGene_14027	--	3.864×10⁻²⁹	3.37655	Up
Homo_sapiens_newGene_14112	--	1.195×10⁻⁴	1.11242	Up
Homo_sapiens_newGene_14286	--	9.048×10⁻⁵	0.827979	Up
Homo_sapiens_newGene_14409	--	4.417×10⁻²	0.755936	Up
Homo_sapiens_newGene_14454	--	7.37×10⁻⁶	0.949312	Up
Homo_sapiens_newGene_14471	--	4.878×10⁻³	0.880474	Up
Homo_sapiens_newGene_14592	--	3.918×10⁻⁶	0.906218	Up
Homo_sapiens_newGene_1490	--	7.811×10⁻⁹	1.2805	Up
Homo_sapiens_newGene_1511	--	9.98×10⁻⁴	0.810586	Up
Homo_sapiens_newGene_1529	--	4.586×10⁻⁵	1.53537	Up
Homo_sapiens_newGene_1538	--	1.484×10⁻²¹	1.83157	Up
Homo_sapiens_newGene_1816	--	1.095×10⁻³	0.971465	Up
Homo_sapiens_newGene_1828	--	3.877×10⁻²	0.63237	Up
Homo_sapiens_newGene_1867	--	6.704×10⁻⁴	1.14602	Up
Homo_sapiens_newGene_1906	--	7.532×10⁻⁸	0.960396	Up
Homo_sapiens_newGene_2112	--	4.163×10⁻²	0.645431	Up
Homo_sapiens_newGene_224	--	4.488×10⁻⁴	0.9535	Up
Homo_sapiens_newGene_2249	--	4.695×10⁻²	0.585847	Up
Homo_sapiens_newGene_2380	--	3.023×10⁻¹³	0.733766	Up
Homo_sapiens_newGene_2381	--	5.492×10⁻⁶	1.48867	Up
Homo_sapiens_newGene_2401	--	3.23×10⁻⁵	1.77628	Up
Homo_sapiens_newGene_241	--	1.108×10⁻⁵	1.19262	Up
Homo_sapiens_newGene_2462	--	1.355×10⁻²⁷	1.54526	Up
Homo_sapiens_newGene_2465	--	9.823×10⁻⁵	1.6157	Up
Homo_sapiens_newGene_2665	--	7.157×10⁻³	0.818172	Up
Homo_sapiens_newGene_2700	--	1.075×10⁻³	1.34018	Up
Homo_sapiens_newGene_2815	--	5.691×10⁻¹⁰	0.771901	Up
Homo_sapiens_newGene_32	--	2.405×10⁻²	0.656601	Up
Homo_sapiens_newGene_3250	--	1.092×10⁻¹¹	1.71108	Up
Homo_sapiens_newGene_3336	--	9.607×10⁻³	0.687127	Up
Homo_sapiens_newGene_3358	--	1.14×10⁻⁵	0.893113	Up
Homo_sapiens_newGene_3359	--	1.128×10⁻⁶	1.07371	Up
Homo_sapiens_newGene_3436	--	6.214×10⁻³	0.621543	Up
Homo_sapiens_newGene_3460	--	1.258×10⁻³	0.682732	Up
Homo_sapiens_newGene_3491	--	6.458×10⁻⁴	0.773701	Up
Homo_sapiens_newGene_3495	--	1.551×10⁻⁸	2.04674	Up
Homo_sapiens_newGene_3748	--	1.898×10⁻⁴	0.706972	Up
Homo_sapiens_newGene_3754	--	4.173×10⁻⁴	1.17755	Up
Homo_sapiens_newGene_381	--	2.344×10⁻³	0.762198	Up
Homo_sapiens_newGene_3834	--	1.976×10⁻⁶	1.06145	Up
Homo_sapiens_newGene_3854	--	2.714×10⁻⁹	0.92646	Up
Homo_sapiens_newGene_3893	--	7.305×10⁻⁶	0.649643	Up
Homo_sapiens_newGene_394	--	1.073×10⁻⁵	1.08687	Up
Homo_sapiens_newGene_3982	--	7.967×10⁻⁵	1.73821	Up
Homo_sapiens_newGene_3999	--	1.205×10⁻³	0.886682	Up
Homo_sapiens_newGene_4043	--	2.546×10⁻²	0.84425	Up
Homo_sapiens_newGene_4204	--	1.799×10⁻⁷	1.88072	Up
Homo_sapiens_newGene_4335	--	4.187×10⁻²	0.851814	Up
Homo_sapiens_newGene_4362	--	2.191×10⁻³	0.65497	Up
Homo_sapiens_newGene_4379	--	3.102×10⁻¹⁵	1.3369	Up
Homo_sapiens_newGene_4393	--	1.584×10⁻¹⁵	1.18809	Up
Homo_sapiens_newGene_4400	--	3.804×10⁻⁶	1.38553	Up
Homo_sapiens_newGene_4403	--	3.277×10⁻⁶	1.25292	Up
Homo_sapiens_newGene_4405	--	9.2×10⁻³	0.891749	Up
Homo_sapiens_newGene_4424	--	7.593×10⁻¹⁰	0.684432	Up
Homo_sapiens_newGene_4498	--	4.494×10⁻⁵	1.0696	Up
Homo_sapiens_newGene_4506	--	3.118×10⁻¹⁴⁸	2.59041	Up
Homo_sapiens_newGene_4509	--	3.848×10⁻³	1.2725	Up
Homo_sapiens_newGene_4535	--	1.252×10⁻⁴	0.755521	Up
Homo_sapiens_newGene_4552	--	4.503×10⁻⁷	0.905583	Up
Homo_sapiens_newGene_4568	--	3.816×10⁻³	0.734568	Up
Homo_sapiens_newGene_4574	--	1.323×10⁻⁵	0.801253	Up
Homo_sapiens_newGene_4579	--	3.973×10⁻⁴	0.930793	Up
Homo_sapiens_newGene_4646	--	1.624×10⁻³	1.00309	Up
Homo_sapiens_newGene_4835	--	1.217×10⁻²	0.712166	Up
Homo_sapiens_newGene_5179	--	1.996×10⁻⁴	0.915215	Up
Homo_sapiens_newGene_5356	--	1.431×10⁻²	0.756831	Up
Homo_sapiens_newGene_5430	--	2.519×10⁻⁴	1.10533	Up
Homo_sapiens_newGene_5488	--	5.864×10⁻¹⁶	1.23804	Up
Homo_sapiens_newGene_5772	--	1.881×10⁻²	0.786236	Up
Homo_sapiens_newGene_586	--	2.188×10⁻⁷	1.08675	Up
Homo_sapiens_newGene_5975	--	6.696×10⁻³	0.667604	Up
Homo_sapiens_newGene_5984	--	7.839×10⁻³	0.813138	Up
Homo_sapiens_newGene_5991	--	2.544×10⁻¹³	2.39316	Up
Homo_sapiens_newGene_6034	--	4.013×10⁻³	0.620776	Up
Homo_sapiens_newGene_6063	--	4.148×10⁻²	0.587277	Up
Homo_sapiens_newGene_6174	--	3.917×10⁻⁹	1.31499	Up
Homo_sapiens_newGene_6248	--	2.698×10⁻²	0.824654	Up
Homo_sapiens_newGene_6411	--	6.887×10⁻⁴	0.93111	Up
Homo_sapiens_newGene_6442	--	4.365×10⁻¹⁵	0.889796	Up
Homo_sapiens_newGene_6512	--	4.724×10⁻⁶	0.948874	Up
Homo_sapiens_newGene_655	--	5.186×10⁻⁴	0.761904	Up
Homo_sapiens_newGene_6608	--	7.462×10⁻⁸	1.06408	Up
Homo_sapiens_newGene_6780	--	4.823×10⁻²⁹	1.96926	Up
Homo_sapiens_newGene_6781	--	4.37×10⁻⁸⁰	2.36029	Up
Homo_sapiens_newGene_6785	--	1.539×10⁻²⁰	0.704206	Up
Homo_sapiens_newGene_6883	--	2.58×10⁻²⁶	0.633993	Up
Homo_sapiens_newGene_6910	--	3.143×10⁻⁴	0.998623	Up
Homo_sapiens_newGene_7112	--	1.686×10⁻²	0.850643	Up
Homo_sapiens_newGene_7120	--	2.444×10⁻³	0.621232	Up
Homo_sapiens_newGene_715	--	4.696×10⁻³	0.805203	Up
Homo_sapiens_newGene_717	--	3.221×10⁻²	0.732656	Up
Homo_sapiens_newGene_7236	--	2.626×10⁻¹³	0.688095	Up
Homo_sapiens_newGene_7310	--	7.798×10⁻¹⁰	0.635836	Up
Homo_sapiens_newGene_7331	--	4.051×10⁻³	0.963065	Up
Homo_sapiens_newGene_749	--	4.387×10⁻⁹	0.662432	Up
Homo_sapiens_newGene_7538	--	3.835×10⁻¹⁰	1.05665	Up
Homo_sapiens_newGene_754	--	2.855×10⁻³	0.897562	Up
Homo_sapiens_newGene_764	--	1.928×10⁻⁹	0.869279	Up
Homo_sapiens_newGene_775	--	4.606×10⁻³	1.12512	Up
Homo_sapiens_newGene_7875	--	1.024×10⁻²	0.693906	Up
Homo_sapiens_newGene_8098	--	4.268×10⁻¹⁴	0.670666	Up
Homo_sapiens_newGene_8144	--	2.271×10⁻⁷	1.21304	Up
Homo_sapiens_newGene_8149	--	1.922×10⁻⁸	0.842013	Up
Homo_sapiens_newGene_8166	--	6.223×10⁻⁵	1.53865	Up
Homo_sapiens_newGene_8293	--	2.689×10⁻⁷	1.47622	Up
Homo_sapiens_newGene_8314	--	9.052×10⁻⁶	0.829797	Up
Homo_sapiens_newGene_847	--	5.764×10⁻⁸	0.840068	Up
Homo_sapiens_newGene_8471	--	2.046×10⁻¹⁰	0.615035	Up
Homo_sapiens_newGene_8508	--	3.575×10⁻³	0.627969	Up
Homo_sapiens_newGene_8539	--	0	3.50212	Up
Homo_sapiens_newGene_8577	--	3.746×10⁻⁴	0.678831	Up
Homo_sapiens_newGene_8772	--	5.641×10⁻⁵	0.842342	Up
Homo_sapiens_newGene_8803	--	8.283×10⁻⁴	1.02435	Up
Homo_sapiens_newGene_8882	--	1.7×10⁻⁴	1.20268	Up
Homo_sapiens_newGene_9054	--	1.666×10⁻⁴	0.717101	Up
Homo_sapiens_newGene_9099	--	1.895×10⁻¹⁶	1.08051	Up
Homo_sapiens_newGene_9112	--	1.099×10⁻¹⁸	1.29122	Up
Homo_sapiens_newGene_9126	--	9.445×10⁻¹⁴	0.892264	Up
Homo_sapiens_newGene_923	--	1.805×10⁻⁴	0.831961	Up
Homo_sapiens_newGene_9249	--	4.892×10⁻²	0.638046	Up
Homo_sapiens_newGene_9284	--	1.448×10⁻³	1.05437	Up
Homo_sapiens_newGene_931	--	1.104×10⁻⁷	1.08217	Up
Homo_sapiens_newGene_9339	--	5.619×10⁻²⁰	1.57328	Up
Homo_sapiens_newGene_9347	--	3.247×10⁻³	0.631198	Up
Homo_sapiens_newGene_9353	--	9.785×10⁻⁵	1.02194	Up
Homo_sapiens_newGene_940	--	1.779×10⁻³	1.09334	Up
Homo_sapiens_newGene_944	--	1.243×10⁻³	0.693822	Up
Homo_sapiens_newGene_949	--	1.404×10⁻²	0.712486	Up
Homo_sapiens_newGene_9585	--	4.413×10⁻³	0.682359	Up
Homo_sapiens_newGene_9647	--	1.902×10⁻²	0.591286	Up
Homo_sapiens_newGene_9662	--	4.041×10⁻¹¹	3.17483	Up
Homo_sapiens_newGene_9700	--	1.688×10⁻¹⁴	1.49321	Up
Homo_sapiens_newGene_9736	--	3.591×10⁻²¹	1.28426	Up
Homo_sapiens_newGene_9897	--	3.084×10⁻²	0.621279	Up
Homo_sapiens_newGene_9951	--	5.723×10⁻⁶	0.597764	Up
Homo_sapiens_newGene_9952	--	8.79×10⁻¹³	0.989038	Up

## Sheet: Table SIV
Table SIV. List of dowregulated differentially expressed genes from RNA-seq data GSE290378
ID.	Gene name	P-value	log2FC	Regulated
ENSG00000000971	CFH	1.957×10⁻²⁶	-0.597312	Down
ENSG00000002587	HS3ST1	9.295×10⁻²⁰	-1.26362	Down
ENSG00000004455	AK2	1.201×10⁻⁵⁰	-0.754661	Down
ENSG00000005981	ASB4	1.745×10⁻³	-0.879736	Down
ENSG00000006747	SCIN	9.948×10⁻²⁷	-1.02097	Down
ENSG00000007968	E2F2	2.336×10⁻⁵⁸	-1.67487	Down
ENSG00000008283	CYB561	1.251×10⁻¹³	-2.58668	Down
ENSG00000008513	ST3GAL1	3.653×10⁻³³	-0.893625	Down
ENSG00000011422	PLAUR	2.045×10⁻⁵	-1.57292	Down
ENSG00000012048	BRCA1	7.605×10⁻⁶⁵	-0.865192	Down
ENSG00000013573	DDX11	3.404×10⁻⁴⁹	-0.703503	Down
ENSG00000014138	POLA2	8.824×10⁻³¹	-0.840418	Down
ENSG00000015479	MATR3	3.508×10⁻²	-0.705369	Down
ENSG00000018625	ATP1A2	1.245×10⁻³	-0.791144	Down
ENSG00000019186	CYP24A1	2.215×10⁻⁸	-1.76492	Down
ENSG00000019991	HGF	7.999×10⁻¹⁴	-1.1226	Down
ENSG00000020577	SAMD4A	1.895×10⁻¹⁶	-0.737652	Down
ENSG00000023909	GCLM	8.698×10⁻²⁴	-0.653454	Down
ENSG00000026751	SLAMF7	5.117×10⁻³³	-0.835262	Down
ENSG00000027075	PRKCH	1.533×10⁻¹²	-0.941958	Down
ENSG00000028277	POU2F2	7.754×10⁻³³	-1.16648	Down
ENSG00000029534	ANK1	4.295×10⁻²⁴	-0.720915	Down
ENSG00000033867	SLC4A7	1.182×10⁻²⁵	-0.745004	Down
ENSG00000034152	MAP2K3	7.846×10⁻³³	-0.591309	Down
ENSG00000035499	DEPDC1B	6.841×10⁻⁶³	-0.964392	Down
ENSG00000040199	PHLPP2	1.06×10⁻¹¹	-0.797271	Down
ENSG00000040275	SPDL1	4.814×10⁻⁵⁰	-0.980291	Down
ENSG00000041982	TNC	5.624×10⁻³⁵	-0.752258	Down
ENSG00000047457	CP	1.146×10⁻¹³	-1.91856	Down
ENSG00000048544	MRPS10	6.199×10⁻³⁰	-0.61281	Down
ENSG00000049541	RFC2	4.154×10⁻³³	-0.639065	Down
ENSG00000051180	RAD51	2.623×10⁻⁷	-0.634994	Down
ENSG00000051382	PIK3CB	5.696×10⁻⁴⁰	-0.843231	Down
ENSG00000051596	THOC3	2.163×10⁻³⁴	-1.04774	Down
ENSG00000053372	MRTO4	8.525×10⁻⁴¹	-0.699736	Down
ENSG00000054967	RELT	4.118×10⁻⁸	-0.59207	Down
ENSG00000055070	SZRD1	1.897×10⁻⁴⁶	-0.626624	Down
ENSG00000056050	HPF1	1.079×10⁻¹⁰	-0.632882	Down
ENSG00000056736	IL17RB	3.37×10⁻¹⁴	-0.804047	Down
ENSG00000058085	LAMC2	7.759×10⁻⁶⁵	-0.76219	Down
ENSG00000060688	SNRNP40	1.349×10⁻²¹	-0.589111	Down
ENSG00000061337	LZTS1	6.298×10⁻²⁹	-1.06349	Down
ENSG00000064205	WISP2	3.95×10⁻³⁸	-1.57015	Down
ENSG00000064309	CDON	1.8×10⁻⁹	-0.626716	Down
ENSG00000065328	MCM10	1.507×10⁻⁶³	-1.08755	Down
ENSG00000065809	FAM107B	1.763×10⁻⁴⁴	-0.838979	Down
ENSG00000066557	LRRC40	3.61×10⁻¹⁵	-0.631909	Down
ENSG00000067445	TRO	1.803×10⁻¹²	-1.12834	Down
ENSG00000067992	PDK3	2.939×10⁻¹⁶	-1.50774	Down
ENSG00000068078	FGFR3	3.328×10⁻⁸	-0.948549	Down
ENSG00000069020	MAST4	2.715×10⁻²	-0.627489	Down
ENSG00000069122	ADGRF5	7.×10⁻¹²	-1.95915	Down
ENSG00000069702	TGFBR3	1.037×10⁻¹³	-0.88904	Down
ENSG00000070718	AP3M2	1.079×10⁻¹²	-0.617072	Down
ENSG00000073008	PVR	4.672×10⁻³⁶	-0.590728	Down
ENSG00000073111	MCM2	1.154×10⁻⁹³	-0.886955	Down
ENSG00000073711	PPP2R3A	1.06×10⁻¹⁵	-0.696103	Down
ENSG00000073756	PTGS2	3.059×10⁻³	-0.816657	Down
ENSG00000074800	ENO1	3.439×10⁻⁵¹	-0.662558	Down
ENSG00000075131	TIPIN	4.038×10⁻¹⁹	-0.873093	Down
ENSG00000075213	SEMA3A	1.136×10⁻⁴⁸	-0.880937	Down
ENSG00000075218	GTSE1	2.473×10⁻²⁷	-0.587153	Down
ENSG00000075407	ZNF37A	1.001×10⁻¹⁴	-0.982365	Down
ENSG00000076003	MCM6	2.636×10⁻⁶⁷	-0.952808	Down
ENSG00000076356	PLXNA2	2.021×10⁻³	-0.826755	Down
ENSG00000077264	PAK3	2.272×10⁻²	-0.599226	Down
ENSG00000077782	FGFR1	4.217×10⁻⁶⁷	-0.818726	Down
ENSG00000079385	CEACAM1	6.229×10⁻⁹	-1.76454	Down
ENSG00000080824	HSP90AA1	4.469×10⁻¹¹⁰	-0.836257	Down
ENSG00000081026	MAGI3	5.288×10⁻¹³	-0.699651	Down
ENSG00000081870	HSPB11	1.477×10⁻¹³	-0.671084	Down
ENSG00000082458	DLG3	8.335×10⁻⁷	-0.925318	Down
ENSG00000082482	KCNK2	5.362×10⁻⁴	-0.836176	Down
ENSG00000085563	ABCB1	2.875×10⁻³⁵	-0.983947	Down
ENSG00000085840	ORC1	1.364×10⁻³³	-0.808949	Down
ENSG00000085999	RAD54L	1.069×10⁻²⁷	-0.875977	Down
ENSG00000088035	ALG6	2.009×10⁻⁹	-0.586224	Down
ENSG00000088756	ARHGAP28	9.803×10⁻⁹	-1.25248	Down
ENSG00000088808	PPP1R13B	1.161×10⁻⁵	-0.663018	Down
ENSG00000088826	SMOX	3.792×10⁻⁵³	-0.657286	Down
ENSG00000089723	OTUB2	9.681×10⁻³⁴	-0.6703	Down
ENSG00000090273	NUDC	9.296×10⁻³⁴	-0.671544	Down
ENSG00000090530	P3H2	8.152×10⁻²⁶	-0.699991	Down
ENSG00000091106	NLRC4	2.325×10⁻⁴	-1.12084	Down
ENSG00000091129	NRCAM	2.93×10⁻²⁵	-0.936807	Down
ENSG00000092421	SEMA6A	1.596×10⁻³¹	-0.733153	Down
ENSG00000092470	WDR76	9.233×10⁻²⁵	-0.902293	Down
ENSG00000092607	TBX15	2.674×10⁻⁴	-0.973657	Down
ENSG00000092853	CLSPN	2.941×10⁻⁷¹	-1.33391	Down
ENSG00000093009	CDC45	1.19×10⁻⁵⁵	-0.934505	Down
ENSG00000094804	CDC6	6.042×10⁻⁸⁸	-0.934696	Down
ENSG00000094880	CDC23	8.976×10⁻²⁵	-0.602112	Down
ENSG00000095002	MSH2	1.064×10⁻⁴³	-0.824286	Down
ENSG00000095203	EPB41L4B	1.823×10⁻¹⁹	-1.25717	Down
ENSG00000095303	PTGS1	6.859×10⁻¹⁶	-1.50093	Down
ENSG00000095637	SORBS1	1.729×10⁻²⁷	-1.1298	Down
ENSG00000096060	FKBP5	2.259×10⁻¹⁶	-0.591222	Down
ENSG00000097046	CDC7	2.725×10⁻²⁷	-0.941839	Down
ENSG00000099282	TSPAN15	3.357×10⁻²³	-1.11355	Down
ENSG00000099338	CATSPERG	6.759×10⁻⁷	-0.8311	Down
ENSG00000099901	RANBP1	6.203×10⁻³⁰	-0.667222	Down
ENSG00000100055	CYTH4	9.929×10⁻⁵	-1.45308	Down
ENSG00000100077	GRK3	1.104×10⁻⁴	-1.44544	Down
ENSG00000100147	CCDC134	1.218×10⁻⁶	-0.796761	Down
ENSG00000100162	CENPM	4.129×10⁻²⁴	-0.911004	Down
ENSG00000100292	HMOX1	4.729×10⁻¹⁴³	-1.08201	Down
ENSG00000100297	MCM5	7.461×10⁻⁷⁴	-0.919161	Down
ENSG00000100342	APOL1	7.448×10⁻⁹²	-0.954231	Down
ENSG00000100479	POLE2	1.355×10⁻¹³	-1.01458	Down
ENSG00000100490	CDKL1	3.473×10⁻³	-0.720167	Down
ENSG00000100526	CDKN3	1.447×10⁻¹⁴	-0.77248	Down
ENSG00000100629	CEP128	1.26×10⁻⁴	-0.615469	Down
ENSG00000101017	CD40	2.737×10⁻³	-0.657313	Down
ENSG00000101049	SGK2	1.367×10⁻¹⁶	-1.1666	Down
ENSG00000101057	MYBL2	2.664×10⁻¹¹⁶	-1.40321	Down
ENSG00000101187	SLCO4A1	2.411×10⁻¹⁵⁰	-1.69917	Down
ENSG00000101412	E2F1	1.817×10⁻³⁶	-0.680172	Down
ENSG00000101546	RBFA	2.045×10⁻¹⁷	-0.606767	Down
ENSG00000101773	RBBP8	7.5×10⁻²⁴	-0.602785	Down
ENSG00000101888	NXT2	2.307×10⁻³	-0.673923	Down
ENSG00000101938	CHRDL1	1.016×10⁻¹³⁴	-1.68732	Down
ENSG00000102174	PHEX	5.133×10⁻⁵	-1.29982	Down
ENSG00000102385	DRP2	4.62×10⁻¹⁰	-1.26053	Down
ENSG00000102452	NALCN	6.237×10⁻⁹	-0.891557	Down
ENSG00000102879	CORO1A	1.194×10⁻²	-0.864321	Down
ENSG00000103005	USB1	3.672×10⁻⁶³	-0.834427	Down
ENSG00000103044	HAS3	1.384×10⁻⁵⁰	-1.13245	Down
ENSG00000103187	COTL1	1.14×10⁻⁷	-0.771123	Down
ENSG00000103257	SLC7A5	2.368×10⁻³⁵	-0.674455	Down
ENSG00000103316	CRYM	3.362×10⁻⁹	-1.01926	Down
ENSG00000103888	CEMIP	2.057×10⁻¹⁰	-0.866505	Down
ENSG00000104055	TGM5	6.26×10⁻¹²	-1.76222	Down
ENSG00000104140	RHOV	2.604×10⁻⁴	-0.919097	Down
ENSG00000104205	SGK3	3.825×10⁻⁷	-0.85843	Down
ENSG00000104321	TRPA1	2.984×10⁻²⁰	-1.51374	Down
ENSG00000104450	SPAG1	1.57×10⁻¹⁸	-0.7387	Down
ENSG00000104738	MCM4	1.63×10⁻⁷⁸	-0.879577	Down
ENSG00000105011	ASF1B	1.073×10⁻²²	-0.682011	Down
ENSG00000105146	AURKC	1.139×10⁻⁶	-1.19554	Down
ENSG00000105509	HAS1	2.489×10⁻⁹	-1.01392	Down
ENSG00000105699	LSR	2.28×10⁻¹¹⁹	-1.6965	Down
ENSG00000105767	CADM4	1.532×10⁻⁴¹	-1.25739	Down
ENSG00000105771	SMG9	1.05×10⁻²⁵	-0.629265	Down
ENSG00000105810	CDK6	6.023×10⁻¹²⁰	-0.968297	Down
ENSG00000105894	PTN	1.272×10⁻⁹	-0.693735	Down
ENSG00000105971	CAV2	3.254×10⁻²⁸	-0.619577	Down
ENSG00000106462	EZH2	5.485×10⁻³⁴	-0.70444	Down
ENSG00000106537	TSPAN13	5.713×10⁻¹³	-1.19613	Down
ENSG00000106541	AGR2	4.751×10⁻³	-0.798201	Down
ENSG00000107014	RLN2	1.556×10⁻²	-0.756026	Down
ENSG00000107159	CA9	9.358×10⁻⁶⁵	-1.4436	Down
ENSG00000107984	DKK1	3.914×10⁻¹³³	-1.38371	Down
ENSG00000108375	RNF43	7.776×10⁻¹¹	-0.697075	Down
ENSG00000108384	RAD51C	5.673×10⁻¹⁸	-0.723968	Down
ENSG00000108691	CCL2	3.658×10⁻¹¹	-3.25076	Down
ENSG00000108848	LUC7L3	2.82×10⁻²⁶	-0.585218	Down
ENSG00000108924	HLF	2.019×10⁻¹⁵	-1.29032	Down
ENSG00000109255	NMU	7.909×10⁻⁷	-0.980869	Down
ENSG00000109272	PF4V1	4.392×10⁻¹¹	-2.7672	Down
ENSG00000109674	NEIL3	2.097×10⁻¹⁴	-0.708673	Down
ENSG00000110063	DCPS	5.874×10⁻⁹	-0.643427	Down
ENSG00000110328	GALNT18	4.785×10⁻²²	-1.34686	Down
ENSG00000110583	NAA40	4.94×10⁻²²	-0.585369	Down
ENSG00000110880	CORO1C	7.859×10⁻⁹⁶	-0.796035	Down
ENSG00000110911	SLC11A2	3.423×10⁻²¹	-0.592957	Down
ENSG00000111247	RAD51AP1	1.677×10⁻¹³	-0.601346	Down
ENSG00000111319	SCNN1A	8.575×10⁻²⁷	-1.43275	Down
ENSG00000111331	OAS3	3.002×10⁻³⁸	-0.817122	Down
ENSG00000111335	OAS2	8.19×10⁻³	-0.820206	Down
ENSG00000111602	TIMELESS	8.565×10⁻³⁵	-0.610083	Down
ENSG00000111615	KRR1	7.538×10⁻²⁷	-0.591761	Down
ENSG00000111665	CDCA3	7.279×10⁻²¹	-0.586564	Down
ENSG00000111684	LPCAT3	9.445×10⁻¹⁶	-0.857026	Down
ENSG00000111962	UST	1.148×10⁻⁶	-0.817043	Down
ENSG00000112029	FBXO5	6.369×10⁻²¹	-0.765801	Down
ENSG00000112078	KCTD20	1.445×10⁻²¹	-0.667283	Down
ENSG00000112118	MCM3	4.133×10⁻⁷²	-0.931882	Down
ENSG00000112149	CD83	2.471×10⁻⁶	-0.726789	Down
ENSG00000112303	VNN2	5.54×10⁻⁵	-0.688475	Down
ENSG00000112576	CCND3	5.546×10⁻³⁴	-0.767247	Down
ENSG00000112773	TENT5A	2.296×10⁻⁵	-0.738979	Down
ENSG00000112902	SEMA5A	2.026×10⁻⁶	-0.958441	Down
ENSG00000112984	KIF20A	1.258×10⁻³¹	-0.681107	Down
ENSG00000113068	PFDN1	5.081×10⁻¹⁹	-0.611528	Down
ENSG00000113070	HBEGF	2.345×10⁻²⁷	-1.14773	Down
ENSG00000113249	HAVCR1	3.259×10⁻¹⁴	-1.34592	Down
ENSG00000113356	POLR3G	8.672×10⁻²²	-0.754423	Down
ENSG00000113368	LMNB1	4.716×10⁻⁶²	-0.854713	Down
ENSG00000113504	SLC12A7	7.15×10⁻¹⁷	-2.35159	Down
ENSG00000113575	PPP2CA	1.363×10⁻⁵²	-0.659984	Down
ENSG00000113594	LIFR	4.077×10⁻⁶	-1.20576	Down
ENSG00000113645	WWC1	4.308×10⁻⁷⁹	-0.988416	Down
ENSG00000113810	SMC4	6.319×10⁻³⁴	-0.661897	Down
ENSG00000114115	RBP1	1.981×10⁻⁵	-0.726487	Down
ENSG00000114251	WNT5A	9.147×10⁻¹⁶	-0.991888	Down
ENSG00000114638	UPK1B	7.575×10⁻¹¹³	-2.63609	Down
ENSG00000115590	IL1R2	5.754×10⁻²³	-1.7525	Down
ENSG00000115594	IL1R1	1.075×10⁻³⁰	-1.07815	Down
ENSG00000115657	ABCB6	2.369×10⁻⁷	-0.789353	Down
ENSG00000115758	ODC1	1.088×10⁻³²	-0.649189	Down
ENSG00000116455	WDR77	1.351×10⁻³³	-0.700184	Down
ENSG00000116675	DNAJC6	6.466×10⁻⁷⁴	-1.31853	Down
ENSG00000116701	NCF2	1.264×10⁻⁷	-0.883487	Down
ENSG00000116774	OLFML3	1.898×10⁻⁵⁸	-0.877556	Down
ENSG00000116833	NR5A2	2.888×10⁻²⁰	-1.30254	Down
ENSG00000116871	MAP7D1	2.975×10⁻⁴³	-0.700731	Down
ENSG00000116922	C1orf109	2.37×10⁻¹⁶	-0.727348	Down
ENSG00000117009	KMO	3.017×10⁻⁴	-1.14116	Down
ENSG00000117069	ST6GALNAC5	2.371×10⁻²⁴	-1.19373	Down
ENSG00000117226	GBP3	1.636×10⁻²⁰	-1.18744	Down
ENSG00000117228	GBP1	1.065×10⁻²⁶	-0.940937	Down
ENSG00000117298	ECE1	9.676×10⁻¹²⁵	-1.28492	Down
ENSG00000117318	ID3	7.54×10⁻⁶⁰	-0.907368	Down
ENSG00000117399	CDC20	2.057×10⁻⁷⁴	-0.739627	Down
ENSG00000117407	ARTN	1.419×10⁻⁶	-1.49252	Down
ENSG00000117525	F3	2.217×10⁻²⁵	-0.999394	Down
ENSG00000117528	ABCD3	1.506×10⁻²³	-0.601524	Down
ENSG00000117748	RPA2	6.495×10⁻²²	-0.650724	Down
ENSG00000117751	PPP1R8	2.063×10⁻¹⁸	-0.598725	Down
ENSG00000118655	DCLRE1B	4.33×10⁻¹³	-0.639927	Down
ENSG00000119139	TJP2	1.381×10⁻⁷²	-0.9126	Down
ENSG00000119640	ACYP1	2.32×10⁻⁴	-0.604631	Down
ENSG00000119737	GPR75	4.847×10⁻⁵	-1.29859	Down
ENSG00000119812	FAM98A	2.529×10⁻⁴⁰	-0.848625	Down
ENSG00000119969	HELLS	3.97×10⁻²⁹	-0.651967	Down
ENSG00000120217	CD274	1.221×10⁻¹³	-0.91202	Down
ENSG00000120594	PLXDC2	1.792×10⁻¹⁶	-0.944542	Down
ENSG00000120820	GLT8D2	6.608×10⁻⁴	-0.821726	Down
ENSG00000121152	NCAPH	1.179×10⁻³⁶	-0.629368	Down
ENSG00000121578	B4GALT4	1.152×10⁻¹⁶	-0.758104	Down
ENSG00000121690	DEPDC7	9.096×10⁻⁴	-0.592285	Down
ENSG00000121858	TNFSF10	2.35×10⁻⁵	-0.868252	Down
ENSG00000121895	TMEM156	4.085×10⁻⁴⁵	-0.756137	Down
ENSG00000121940	CLCC1	1.915×10⁻¹⁴	-0.608084	Down
ENSG00000121957	GPSM2	9.412×10⁻²⁴	-0.651344	Down
ENSG00000122483	CCDC18	4.245×10⁻¹⁴	-0.770479	Down
ENSG00000122694	GLIPR2	1.082×10⁻²	-0.667322	Down
ENSG00000122952	ZWINT	6.814×10⁻⁶⁰	-0.777227	Down
ENSG00000123219	CENPK	2.578×10⁻²⁷	-0.796634	Down
ENSG00000123374	CDK2	3.111×10⁻⁴⁴	-0.769253	Down
ENSG00000123416	TUBA1B	2.121×10⁻⁶⁶	-0.804937	Down
ENSG00000123473	STIL	7.589×10⁻²⁰	-0.694091	Down
ENSG00000123612	ACVR1C	4.326×10⁻⁴	-0.961083	Down
ENSG00000124216	SNAI1	2.591×10⁻⁶	-1.44215	Down
ENSG00000124564	SLC17A3	2.364×10⁻³	-0.97979	Down
ENSG00000124615	MOCS1	4.63×10⁻⁶	-0.776061	Down
ENSG00000124749	COL21A1	1.544×10⁻²	-0.786714	Down
ENSG00000124875	CXCL6	1.951×10⁻⁴	-0.714487	Down
ENSG00000125347	IRF1	7.206×10⁻⁵⁸	-1.02287	Down
ENSG00000125351	UPF3B	2.55×10⁻³¹	-0.828845	Down
ENSG00000125454	SLC25A19	1.322×10⁻⁴¹	-0.949528	Down
ENSG00000125731	SH2D3A	3.176×10⁻¹²	-0.853148	Down
ENSG00000125798	FOXA2	1.006×10⁻⁴⁴	-1.34272	Down
ENSG00000125872	LRRN4	6.658×10⁻⁴⁴	-1.34905	Down
ENSG00000125944	HNRNPR	2.65×10⁻⁴²	-0.660887	Down
ENSG00000125962	ARMCX5	2.762×10⁻⁶	-0.712584	Down
ENSG00000125968	ID1	2.945×10⁻⁵⁸	-0.848862	Down
ENSG00000126001	CEP250	5.67×10⁻³³	-0.6097	Down
ENSG00000126067	PSMB2	1.58×10⁻⁴⁹	-0.74693	Down
ENSG00000126698	DNAJC8	5.448×10⁻²⁰	-0.608045	Down
ENSG00000127074	RGS13	2.289×10⁻²	-0.594043	Down
ENSG00000127241	MASP1	1.794×10⁻³	-0.808939	Down
ENSG00000127423	AUNIP	1.364×10⁻¹²	-0.956038	Down
ENSG00000127564	PKMYT1	7.991×10⁻⁷⁰	-1.03461	Down
ENSG00000127585	FBXL16	1.169×10⁻¹¹	-1.10269	Down
ENSG00000128284	APOL3	5.913×10⁻¹⁶	-0.945319	Down
ENSG00000129173	E2F8	3.121×10⁻⁴⁶	-1.54755	Down
ENSG00000129354	AP1M2	3.106×10⁻¹⁰	-0.830386	Down
ENSG00000129422	MTUS1	6.554×10⁻¹⁴	-0.863775	Down
ENSG00000129484	PARP2	8.761×10⁻²²	-0.634175	Down
ENSG00000129521	EGLN3	7.949×10⁻³	-1.04646	Down
ENSG00000129595	EPB41L4A	1.271×10⁻⁵	-0.586948	Down
ENSG00000130303	BST2	8.179×10⁻³⁴	-1.52539	Down
ENSG00000130429	ARPC1B	3.976×10⁻⁸⁴	-1.28182	Down
ENSG00000130635	COL5A1	1.74×10⁻⁴²	-2.04839	Down
ENSG00000130695	CEP85	2.214×10⁻²⁷	-0.720333	Down
ENSG00000130702	LAMA5	1.644×10⁻¹⁵⁶	-1.75855	Down
ENSG00000130816	DNMT1	2.506×10⁻⁴⁴	-0.59634	Down
ENSG00000130940	CASZ1	6.668×10⁻²⁷	-1.91117	Down
ENSG00000131153	GINS2	1.508×10⁻⁴¹	-0.993159	Down
ENSG00000131389	SLC6A6	2.391×10⁻⁷	-1.18313	Down
ENSG00000131470	PSMC3IP	3.968×10⁻⁵⁴	-1.16418	Down
ENSG00000131724	IL13RA1	6.019×10⁻²³	-0.654855	Down
ENSG00000132437	DDC	8.339×10⁻⁴	-1.30288	Down
ENSG00000132470	ITGB4	1.637×10⁻³⁶	-0.590803	Down
ENSG00000132530	XAF1	1.774×10⁻⁸	-1.88469	Down
ENSG00000132554	RGS22	2.325×10⁻²	-0.782058	Down
ENSG00000132613	MTSS1L	2.252×10⁻²²	-0.667042	Down
ENSG00000132646	PCNA	8.449×10⁻³⁸	-0.745243	Down
ENSG00000132773	TOE1	1.177×10⁻¹⁹	-0.701357	Down
ENSG00000132780	NASP	2.24×10⁻⁷⁸	-0.932466	Down
ENSG00000133106	EPSTI1	6.275×10⁻⁷	-1.90567	Down
ENSG00000133131	MORC4	1.315×10⁻⁷⁷	-1.36223	Down
ENSG00000133321	RARRES3	1.051×10⁻³¹	-1.27167	Down
ENSG00000133574	GIMAP4	5.68×10⁻¹¹	-2.59224	Down
ENSG00000134222	PSRC1	2.082×10⁻²²	-0.714606	Down
ENSG00000134259	NGF	2.744×10⁻¹³	-1.66821	Down
ENSG00000134317	GRHL1	6.573×10⁻⁸	-1.21165	Down
ENSG00000134363	FST	6.61×10⁻¹⁸	-2.1205	Down
ENSG00000134470	IL15RA	1.046×10⁻¹⁶	-1.34502	Down
ENSG00000134690	CDCA8	1.649×10⁻⁵⁴	-0.906882	Down
ENSG00000134748	PRPF38A	2.409×10⁻⁵³	-0.986737	Down
ENSG00000134802	SLC43A3	7.914×10⁻³⁹	-0.598877	Down
ENSG00000135100	HNF1A	2.076×10⁻¹⁴	-0.9683	Down
ENSG00000135114	OASL	1.732×10⁻²	-0.649075	Down
ENSG00000135116	HRK	5.708×10⁻³	-0.774737	Down
ENSG00000135373	EHF	7.262×10⁻⁴	-0.900263	Down
ENSG00000135426	TESPA1	1.091×10⁻⁴	-1.19447	Down
ENSG00000135525	MAP7	3.498×10⁻²³	-1.15957	Down
ENSG00000135547	HEY2	3.555×10⁻⁷	-1.09782	Down
ENSG00000135604	STX11	4.905×10⁻⁶	-1.66902	Down
ENSG00000135638	EMX1	3.495×10⁻⁴²	-2.66325	Down
ENSG00000135697	BCO1	2.587×10⁻³	-0.713588	Down
ENSG00000136040	PLXNC1	1.92×10⁻⁵	-1.07226	Down
ENSG00000136527	TRA2B	5.012×10⁻²⁶	-0.612588	Down
ENSG00000136828	RALGPS1	1.233×10⁻²	-0.675788	Down
ENSG00000136848	DAB2IP	3.5×10⁻⁴	-1.00349	Down
ENSG00000136960	ENPP2	9.727×10⁻¹²	-0.842592	Down
ENSG00000137393	RNF144B	3.806×10⁻⁹	-0.938818	Down
ENSG00000137460	FHDC1	2.487×10⁻⁸	-0.630104	Down
ENSG00000137501	SYTL2	4.882×10⁻¹³	-0.64344	Down
ENSG00000137502	RAB30	4.628×10⁻⁷	-1.00465	Down
ENSG00000137672	TRPC6	1.189×10⁻⁶	-1.64815	Down
ENSG00000137673	MMP7	9.603×10⁻⁸⁸	-1.17986	Down
ENSG00000137713	PPP2R1B	1.127×10⁻⁵⁹	-1.00894	Down
ENSG00000137731	FXYD2	4.649×10⁻²¹	-0.616111	Down
ENSG00000137752	CASP1	9.169×10⁻³¹	-0.937099	Down
ENSG00000137804	NUSAP1	4.612×10⁻²⁰	-0.636919	Down
ENSG00000137880	GCHFR	6.601×10⁻³	-0.82809	Down
ENSG00000138092	CENPO	1.116×10⁻²⁵	-0.592019	Down
ENSG00000138316	ADAMTS14	8.96×10⁻⁶	-0.866734	Down
ENSG00000138376	BARD1	2.964×10⁻¹³	-0.620276	Down
ENSG00000138378	STAT4	7.578×10⁻⁴	-1.1035	Down
ENSG00000138587	MNS1	1.129×10⁻³	-0.58804	Down
ENSG00000138621	PPCDC	2.282×10⁻¹⁹	-0.933633	Down
ENSG00000138641	HERC3	3.36×10⁻⁵	-0.760221	Down
ENSG00000138829	FBN2	9.444×10⁻⁷	-0.648843	Down
ENSG00000139209	SLC38A4	1.045×10⁻²²	-0.727662	Down
ENSG00000139278	GLIPR1	3.881×10⁻⁴¹	-0.652997	Down
ENSG00000139438	FAM222A	4.756×10⁻³	-0.891981	Down
ENSG00000139618	BRCA2	1.5×10⁻¹²	-0.730604	Down
ENSG00000139973	SYT16	7.334×10⁻¹⁸	-1.21146	Down
ENSG00000140022	STON2	6.378×10⁻⁵	-1.07582	Down
ENSG00000140284	SLC27A2	8.952×10⁻¹⁵	-1.2616	Down
ENSG00000140534	TICRR	1.029×10⁻¹⁴	-0.653604	Down
ENSG00000140600	SH3GL3	6.344×10⁻³	-0.722652	Down
ENSG00000141449	GREB1L	3.221×10⁻¹⁴	-1.19593	Down
ENSG00000141655	TNFRSF11A	2.421×10⁻¹⁹	-1.38896	Down
ENSG00000141682	PMAIP1	8.818×10⁻¹⁴	-0.783325	Down
ENSG00000141753	IGFBP4	6.455×10⁻⁴⁴	-0.719865	Down
ENSG00000142173	COL6A2	2.635×10⁻²⁸	-0.68012	Down
ENSG00000142230	SAE1	5.979×10⁻⁴⁷	-0.603533	Down
ENSG00000142303	ADAMTS10	5.681×10⁻⁹	-1.64497	Down
ENSG00000142634	EFHD2	1.957×10⁻²⁷	-0.62203	Down
ENSG00000142677	IL22RA1	1.69×10⁻²²	-1.77191	Down
ENSG00000142871	CYR61	1.357×10⁻⁴⁰	-0.642528	Down
ENSG00000142945	KIF2C	5.117×10⁻⁴⁶	-0.758711	Down
ENSG00000143226	FCGR2A	3.309×10⁻⁶	-0.860487	Down
ENSG00000143320	CRABP2	9.412×10⁻¹⁷	-1.35529	Down
ENSG00000143641	GALNT2	2.22×10⁻⁴⁷	-0.612002	Down
ENSG00000143815	LBR	1.919×10⁻³⁸	-0.617472	Down
ENSG00000143924	EML4	2.036×10⁻⁵¹	-0.746119	Down
ENSG00000143942	CHAC2	4.689×10⁻¹⁰	-0.673999	Down
ENSG00000144452	ABCA12	3.33×10⁻⁸	-1.3743	Down
ENSG00000144580	CNOT9	1.906×10⁻²⁸	-0.614024	Down
ENSG00000144802	NFKBIZ	2.959×10⁻²⁶	-0.585701	Down
ENSG00000144847	IGSF11	2.317×10⁻²	-0.714203	Down
ENSG00000145029	NICN1	2.54×10⁻⁴	-1.16593	Down
ENSG00000145088	EAF2	1.802×10⁻³	-0.935286	Down
ENSG00000145386	CCNA2	2.824×10⁻³³	-0.585093	Down
ENSG00000145555	MYO10	1.392×10⁻¹⁰⁵	-1.7518	Down
ENSG00000145777	TSLP	2.379×10⁻²⁶	-1.50432	Down
ENSG00000145779	TNFAIP8	5.691×10⁻³⁰	-1.0936	Down
ENSG00000145824	CXCL14	5.984×10⁻⁸	-1.7567	Down
ENSG00000145934	TENM2	2.015×10⁻⁴³	-0.803267	Down
ENSG00000146151	HMGCLL1	7.93×10⁻⁴	-1.00187	Down
ENSG00000146352	CLVS2	1.109×10⁻⁷	-2.17204	Down
ENSG00000146374	RSPO3	6.367×10⁻⁸	-0.913674	Down
ENSG00000146670	CDCA5	5.63×10⁻⁴⁰	-0.675987	Down
ENSG00000146856	AGBL3	6.055×10⁻⁵	-0.691057	Down
ENSG00000147100	SLC16A2	3.471×10⁻⁸⁷	-1.95785	Down
ENSG00000147224	PRPS1	2.433×10⁻²⁵	-0.661128	Down
ENSG00000147231	RADX	9.92×10⁻⁴	-0.960739	Down
ENSG00000147536	GINS4	2.444×10⁻³¹	-0.882725	Down
ENSG00000147676	MAL2	3.06×10⁻³³	-0.646557	Down
ENSG00000147872	PLIN2	4.733×10⁻³⁸	-0.652523	Down
ENSG00000148120	C9orf3	1.854×10⁻²⁸	-1.04615	Down
ENSG00000148175	STOM	1.108×10⁻³²	-0.728333	Down
ENSG00000148468	FAM171A1	8.833×10⁻⁸	-0.830726	Down
ENSG00000148702	HABP2	6.614×10⁻³⁸	-2.9518	Down
ENSG00000149218	ENDOD1	2.338×10⁻³⁰	-0.646947	Down
ENSG00000149554	CHEK1	4.445×10⁻²⁵	-0.662174	Down
ENSG00000149564	ESAM	4.938×10⁻⁶	-0.918744	Down
ENSG00000149573	MPZL2	3.183×10⁻⁸	-1.41139	Down
ENSG00000149596	JPH2	6.894×10⁻³⁶	-1.11059	Down
ENSG00000151012	SLC7A11	1.412×10⁻⁹	-0.629701	Down
ENSG00000151014	NOCT	1.59×10⁻¹²	-1.04995	Down
ENSG00000151090	THRB	1.423×10⁻²¹	-0.739288	Down
ENSG00000151224	MAT1A	7.941×10⁻²⁴	-0.678767	Down
ENSG00000151233	GXYLT1	4.386×10⁻¹⁴	-0.660177	Down
ENSG00000151490	PTPRO	6.42×10⁻⁶	-0.728603	Down
ENSG00000151725	CENPU	5.958×10⁻²⁴	-0.645847	Down
ENSG00000152056	AP1S3	5.09×10⁻¹⁶	-0.680062	Down
ENSG00000152779	SLC16A12	7.295×10⁻¹⁸	-0.585832	Down
ENSG00000152784	PRDM8	1.257×10⁻⁶²	-0.764532	Down
ENSG00000152939	MARVELD2	2.262×10⁻⁵	-0.611069	Down
ENSG00000152953	STK32B	3.045×10⁻⁶	-1.71956	Down
ENSG00000153048	CARHSP1	9.634×10⁻³⁶	-0.687215	Down
ENSG00000153237	CCDC148	2.278×10⁻⁴	-0.596299	Down
ENSG00000153253	SCN3A	1.263×10⁻¹⁰⁸	-1.65082	Down
ENSG00000153292	ADGRF1	9.743×10⁻¹¹	-1.9352	Down
ENSG00000153395	LPCAT1	1.054×10⁻¹³⁹	-1.14914	Down
ENSG00000153814	JAZF1	6.168×10⁻⁴	-0.862035	Down
ENSG00000153904	DDAH1	6.824×10⁻²³	-0.712441	Down
ENSG00000153989	NUS1	6.898×10⁻⁷⁹	-1.22938	Down
ENSG00000154040	CABYR	5.763×10⁻³	-0.888251	Down
ENSG00000154096	THY1	2.687×10⁻³⁹	-0.752644	Down
ENSG00000154146	NRGN	2.194×10⁻³³	-1.30362	Down
ENSG00000154153	RETREG1	5.98×10⁻⁶	-0.938173	Down
ENSG00000154639	CXADR	6.657×10⁻²⁹	-0.842357	Down
ENSG00000154760	SLFN13	1.648×10⁻¹⁰	-0.631603	Down
ENSG00000154839	SKA1	2.378×10⁻²¹	-0.753963	Down
ENSG00000154914	USP43	1.91×10⁻⁵	-0.761439	Down
ENSG00000154920	EME1	2.55×10⁻¹⁵	-0.648849	Down
ENSG00000155090	KLF10	2.689×10⁻²⁹	-0.865255	Down
ENSG00000155622	XAGE2	1.447×10⁻⁷	-1.11768	Down
ENSG00000155974	GRIP1	4.331×10⁻⁸	-1.16194	Down
ENSG00000156475	PPP2R2B	3.951×10⁻³	-0.793712	Down
ENSG00000156802	ATAD2	3.345×10⁻⁷²	-0.969333	Down
ENSG00000156876	SASS6	1.381×10⁻⁹	-0.585569	Down
ENSG00000157111	TMEM171	1.045×10⁻⁶	-1.15677	Down
ENSG00000157168	NRG1	8.693×10⁻¹³¹	-1.23759	Down
ENSG00000157445	CACNA2D3	6.854×10⁻¹³⁶	-2.16323	Down
ENSG00000157542	KCNJ6	5.797×10⁻³	-0.594349	Down
ENSG00000157557	ETS2	1.478×10⁻³⁴	-0.834801	Down
ENSG00000157600	TMEM164	9.696×10⁻³⁸	-0.957244	Down
ENSG00000157765	SLC34A2	8.302×10⁻⁵⁹	-1.81838	Down
ENSG00000157978	LDLRAP1	1.01×10⁻¹³	-0.691132	Down
ENSG00000158161	EYA3	3.295×10⁻²¹	-0.721467	Down
ENSG00000158555	GDPD5	2.142×10⁻²³	-1.0381	Down
ENSG00000159166	LAD1	2.32×10⁻⁷⁸	-1.40945	Down
ENSG00000159259	CHAF1B	1.354×10⁻²⁵	-0.788742	Down
ENSG00000159403	C1R	2.016×10⁻³⁰	-0.943403	Down
ENSG00000159496	RGL4	4.021×10⁻³	-0.84589	Down
ENSG00000160051	IQCC	6.811×10⁻⁸	-0.689748	Down
ENSG00000160124	CCDC58	2.413×10⁻⁹	-0.743397	Down
ENSG00000160588	MPZL3	2.627×10⁻⁵	-0.963008	Down
ENSG00000160712	IL6R	1.695×10⁻⁷²	-1.29775	Down
ENSG00000160886	LY6K	4.799×10⁻⁵	-1.67438	Down
ENSG00000161021	MAML1	6.959×10⁻²³	-0.745363	Down
ENSG00000161654	LSM12	2.434×10⁻¹²	-0.655669	Down
ENSG00000161692	DBF4B	6.953×10⁻¹⁸	-0.596608	Down
ENSG00000161888	SPC24	1.382×10⁻²	-0.946011	Down
ENSG00000161921	CXCL16	1.07×10⁻⁴	-0.749626	Down
ENSG00000161980	POLR3K	1.976×10⁻¹³	-0.755178	Down
ENSG00000162073	PAQR4	6.281×10⁻⁴³	-0.8461	Down
ENSG00000162086	ZNF75A	1.796×10⁻⁴	-0.905165	Down
ENSG00000162174	ASRGL1	5.639×10⁻³⁶	-1.28095	Down
ENSG00000162366	PDZK1IP1	2.244×10⁻¹³	-0.831827	Down
ENSG00000162433	AK4	1.592×10⁻⁴¹	-0.761296	Down
ENSG00000162607	USP1	1.002×10⁻³⁰	-0.663886	Down
ENSG00000162613	FUBP1	5.458×10⁻²¹	-0.624761	Down
ENSG00000162631	NTNG1	6.851×10⁻¹⁴	-0.641963	Down
ENSG00000162642	C1orf52	7.135×10⁻¹¹	-0.613628	Down
ENSG00000162654	GBP4	1.02×10⁻⁹	-0.827556	Down
ENSG00000162664	ZNF326	2.147×10⁻¹⁶	-0.610565	Down
ENSG00000162745	OLFML2B	6.029×10⁻⁶	-0.663191	Down
ENSG00000162878	PKDCC	2.508×10⁻¹⁶	-1.16761	Down
ENSG00000162894	FCMR	7.724×10⁻¹³	-2.24998	Down
ENSG00000162946	DISC1	1.651×10⁻²	-0.705308	Down
ENSG00000162981	FAM84A	1.318×10⁻³	-0.942668	Down
ENSG00000163032	VSNL1	5.438×10⁻²²	-0.916543	Down
ENSG00000163053	SLC16A14	4.604×10⁻⁴¹	-1.23897	Down
ENSG00000163082	SGPP2	2.672×10⁻¹³	-1.13711	Down
ENSG00000163171	CDC42EP3	9.681×10⁻²⁶	-0.649769	Down
ENSG00000163235	TGFA	9.003×10⁻⁵⁰	-0.829576	Down
ENSG00000163251	FZD5	1.286×10⁻¹⁷	-0.828914	Down
ENSG00000163347	CLDN1	9.64×10⁻⁷⁸	-1.31335	Down
ENSG00000163576	EFHB	3.469×10⁻²⁷	-1.51495	Down
ENSG00000163637	PRICKLE2	2.515×10⁻¹⁰	-0.699445	Down
ENSG00000163739	CXCL1	4.599×10⁻⁴	-0.840307	Down
ENSG00000163864	NMNAT3	1.371×10⁻³	-0.843555	Down
ENSG00000163866	SMIM12	2.242×10⁻¹³	-0.611114	Down
ENSG00000163950	SLBP	1.268×10⁻⁴¹	-0.720597	Down
ENSG00000164002	EXO5	8.284×10⁻⁹	-1.04176	Down
ENSG00000164045	CDC25A	6.638×10⁻³³	-0.858565	Down
ENSG00000164070	HSPA4L	1.41×10⁻³⁸	-0.735413	Down
ENSG00000164120	HPGD	3.038×10⁻¹¹⁰	-1.60677	Down
ENSG00000164142	FAM160A1	1.792×10⁻¹³	-1.09242	Down
ENSG00000164236	ANKRD33B	1.637×10⁻²¹	-0.677651	Down
ENSG00000164251	F2RL1	3.132×10⁻⁵²	-0.683583	Down
ENSG00000164305	CASP3	1.012×10⁻¹³	-0.807507	Down
ENSG00000164318	EGFLAM	1.326×10⁻¹⁰	-1.65283	Down
ENSG00000164342	TLR3	5.652×10⁻⁵	-0.666099	Down
ENSG00000164520	RAET1E	2.938×10⁻⁷	-1.74653	Down
ENSG00000164574	GALNT10	1.699×10⁻⁸⁶	-0.900084	Down
ENSG00000164687	FABP5	4.935×10⁻⁴⁵	-0.857301	Down
ENSG00000164794	KCNV1	1.186×10⁻⁴	-1.18422	Down
ENSG00000165025	SYK	1.787×10⁻¹⁶	-1.24052	Down
ENSG00000165029	ABCA1	7.558×10⁻²⁰	-0.679935	Down
ENSG00000165046	LETM2	1.763×10⁻¹⁴	-0.908696	Down
ENSG00000165092	ALDH1A1	2.476×10⁻¹⁶	-0.738022	Down
ENSG00000165244	ZNF367	1.544×10⁻⁴⁰	-0.978464	Down
ENSG00000165259	HDX	4.876×10⁻²	-0.590585	Down
ENSG00000165323	FAT3	4.39×10⁻³	-0.894722	Down
ENSG00000165443	PHYHIPL	7.758×10⁻³⁵	-2.09556	Down
ENSG00000165480	SKA3	7.629×10⁻¹³	-0.623735	Down
ENSG00000165496	RPL10L	1.076×10⁻³	-0.648749	Down
ENSG00000165521	EML5	5.838×10⁻⁸	-0.866536	Down
ENSG00000165526	RPUSD4	3.862×10⁻⁴¹	-0.897715	Down
ENSG00000165821	SALL2	1.904×10⁻⁸	-0.666294	Down
ENSG00000165983	PTER	9.622×10⁻¹³	-0.84222	Down
ENSG00000166002	SMCO4	7.404×10⁻⁴	-0.60801	Down
ENSG00000166265	CYYR1	2.933×10⁻¹⁵	-1.78405	Down
ENSG00000166313	APBB1	9.428×10⁻³	-0.879352	Down
ENSG00000166349	RAG1	2.158×10⁻⁵	-0.665167	Down
ENSG00000166446	CDYL2	4.578×10⁻³	-0.961533	Down
ENSG00000166510	CCDC68	3.03×10⁻⁹	-0.776301	Down
ENSG00000166845	C18orf54	1.879×10⁻¹⁰	-0.842962	Down
ENSG00000166897	ELFN2	1.675×10⁻⁷⁶	-2.15625	Down
ENSG00000166949	SMAD3	2.074×10⁻³⁸	-0.637542	Down
ENSG00000167165	UGT1A6	5.123×10⁻⁴	-0.865456	Down
ENSG00000167191	GPRC5B	2.317×10⁻¹⁴	-1.2857	Down
ENSG00000167220	HDHD2	1.597×10⁻¹⁰	-0.757686	Down
ENSG00000167232	ZNF91	6.609×10⁻⁶	-1.03033	Down
ENSG00000167306	MYO5B	1.277×10⁻⁴⁵	-0.869468	Down
ENSG00000167524	SGK494	7.322×10⁻⁸	-0.940599	Down
ENSG00000167555	ZNF528	8.926×10⁻⁷	-0.660892	Down
ENSG00000167642	SPINT2	3.905×10⁻⁶	-0.942527	Down
ENSG00000167767	KRT80	1.076×10⁻⁴⁶	-0.602229	Down
ENSG00000167889	MGAT5B	8.394×10⁻¹⁴	-0.674559	Down
ENSG00000167900	TK1	3.025×10⁻⁵⁸	-0.998236	Down
ENSG00000168014	C2CD3	1.269×10⁻²⁴	-0.645901	Down
ENSG00000168016	TRANK1	4.065×10⁻³	-0.607258	Down
ENSG00000168143	FAM83B	2.307×10⁻²	-0.827055	Down
ENSG00000168386	FILIP1L	4.08×10⁻²²	-0.721928	Down
ENSG00000168439	STIP1	1.918×10⁻²⁸	-0.681797	Down
ENSG00000168610	STAT3	4.66×10⁻³⁸	-0.62856	Down
ENSG00000169045	HNRNPH1	2.739×10⁻³⁵	-0.656663	Down
ENSG00000169174	PCSK9	1.382×10⁻⁸⁵	-1.96608	Down
ENSG00000169252	ADRB2	4.069×10⁻⁴⁰	-1.25221	Down
ENSG00000169258	GPRIN1	4.963×10⁻¹⁵	-0.65914	Down
ENSG00000169435	RASSF6	1.992×10⁻²⁰	-1.60381	Down
ENSG00000169439	SDC2	9.034×10⁻³³	-0.671156	Down
ENSG00000169562	GJB1	6.124×10⁻³	-0.838216	Down
ENSG00000169750	RAC3	1.733×10⁻¹⁹	-0.65411	Down
ENSG00000169836	TACR3	3.1×10⁻⁹	-1.25969	Down
ENSG00000169903	TM4SF4	2.677×10⁻³¹	-0.922599	Down
ENSG00000169908	TM4SF1	2.348×10⁻³⁵	-0.585204	Down
ENSG00000169972	PUSL1	3.568×10⁻¹⁹	-0.605284	Down
ENSG00000169991	IFFO2	2.924×10⁻³⁰	-0.875043	Down
ENSG00000170190	SLC16A5	3.442×10⁻²¹	-2.33449	Down
ENSG00000170381	SEMA3E	4.885×10⁻¹³	-1.07426	Down
ENSG00000170458	CD14	1.887×10⁻²	-0.83457	Down
ENSG00000170482	SLC23A1	5.712×10⁻⁵	-1.24769	Down
ENSG00000170584	NUDCD2	7.082×10⁻¹⁷	-0.69707	Down
ENSG00000170624	SGCD	1.82×10⁻³⁹	-1.89022	Down
ENSG00000170962	PDGFD	6.26×10⁻⁹	-0.891308	Down
ENSG00000171049	FPR2	2.059×10⁻²⁰	-1.39249	Down
ENSG00000171051	FPR1	7.617×10⁻⁷	-1.39684	Down
ENSG00000171346	KRT15	8.326×10⁻⁴	-0.631466	Down
ENSG00000171365	CLCN5	1.035×10⁻³	-0.644	Down
ENSG00000171503	ETFDH	1.996×10⁻⁹	-0.655017	Down
ENSG00000171557	FGG	1.3×10⁻²⁰	-1.44502	Down
ENSG00000171560	FGA	3.398×10⁻¹¹	-1.64081	Down
ENSG00000171564	FGB	5.191×10⁻⁷¹	-2.20436	Down
ENSG00000171621	SPSB1	1.322×10⁻²⁴	-0.720671	Down
ENSG00000171729	TMEM51	2.054×10⁻²⁶	-0.941045	Down
ENSG00000171793	CTPS1	3.651×10⁻⁶⁴	-0.927322	Down
ENSG00000171848	RRM2	1.689×10⁻¹²¹	-0.967096	Down
ENSG00000172215	CXCR6	3.439×10⁻¹¹	-2.19489	Down
ENSG00000172346	CSDC2	1.511×10⁻⁶³	-1.77127	Down
ENSG00000172687	ZNF738	3.916×10⁻⁶	-0.761622	Down
ENSG00000172716	SLFN11	3.548×10⁻³⁵	-1.02601	Down
ENSG00000172766	NAA16	2.082×10⁻⁵	-0.634422	Down
ENSG00000172795	DCP2	1.674×10⁻¹³	-0.599363	Down
ENSG00000173041	ZNF680	6.604×10⁻⁵	-0.601828	Down
ENSG00000173083	HPSE	3.633×10⁻⁹	-1.01211	Down
ENSG00000173114	LRRN3	1.239×10⁻²	-0.86563	Down
ENSG00000173175	ADCY5	1.959×10⁻⁷	-1.0223	Down
ENSG00000173546	CSPG4	4.686×10⁻⁸	-1.0289	Down
ENSG00000173674	EIF1AX	3.32×10⁻²⁶	-0.590906	Down
ENSG00000173868	PHOSPHO1	3.574×10⁻⁵	-1.22603	Down
ENSG00000174371	EXO1	5.761×10⁻⁴⁰	-0.787061	Down
ENSG00000174469	CNTNAP2	1.317×10⁻⁵	-1.16834	Down
ENSG00000174473	GALNTL6	1.293×10⁻²	-0.724765	Down
ENSG00000174749	FAM241A	7.882×10⁻¹⁸	-0.811246	Down
ENSG00000174775	HRAS	2.645×10⁻¹⁸	-0.615447	Down
ENSG00000174827	PDZK1	1.173×10⁻¹⁰	-1.17658	Down
ENSG00000174837	ADGRE1	3.753×10⁻²⁸	-1.28636	Down
ENSG00000174899	PQLC2L	1.176×10⁻²	-0.863061	Down
ENSG00000175305	CCNE2	2.708×10⁻⁹	-0.915295	Down
ENSG00000175445	LPL	3.68×10⁻⁷	-0.954197	Down
ENSG00000175556	LONRF3	1.317×10⁻⁵	-0.593794	Down
ENSG00000175567	UCP2	4.12×10⁻⁴	-0.840403	Down
ENSG00000175591	P2RY2	3.135×10⁻³	-0.848414	Down
ENSG00000175793	SFN	5.983×10⁻⁵⁰	-0.996919	Down
ENSG00000176014	TUBB6	1.452×10⁻¹⁰⁴	-1.75862	Down
ENSG00000176046	NUPR1	9.263×10⁻⁴⁶	-1.08936	Down
ENSG00000176092	CRYBG2	2.69×10⁻⁵	-1.07214	Down
ENSG00000176208	ATAD5	1.115×10⁻¹³	-0.731898	Down
ENSG00000176390	CRLF3	1.106×10⁻²⁰	-0.631818	Down
ENSG00000176890	TYMS	4.116×10⁻⁸³	-0.952384	Down
ENSG00000176909	MAMSTR	1.019×10⁻³	-0.635301	Down
ENSG00000177181	RIMKLA	1.138×10⁻⁹	-2.37523	Down
ENSG00000177182	CLVS1	8.667×10⁻¹⁹	-3.85323	Down
ENSG00000177225	GATD1	5.642×10⁻²⁷	-0.689889	Down
ENSG00000177459	ERICH5	7.732×10⁻¹³	-1.22457	Down
ENSG00000177465	ACOT4	3.2×10⁻⁷	-1.20724	Down
ENSG00000177469	CAVIN1	6.516×10⁻¹¹⁷	-0.928724	Down
ENSG00000177606	JUN	8.61×10⁻⁷³	-0.70491	Down
ENSG00000177842	ZNF620	4.662×10⁻⁶	-0.594278	Down
ENSG00000178150	ZNF114	5.277×10⁻³	-0.905652	Down
ENSG00000178537	SLC25A20	7.13×10⁻⁸	-0.791086	Down
ENSG00000178718	RPP25	4.29×10⁻²¹	-0.810309	Down
ENSG00000179023	KLHDC7A	2.116×10⁻⁷²	-2.14125	Down
ENSG00000179148	ALOXE3	7.181×10⁻⁴	-0.941586	Down
ENSG00000179546	HTR1D	3.039×10⁻¹⁷	-0.75825	Down
ENSG00000179583	CIITA	5.79×10⁻¹²	-0.617798	Down
ENSG00000179674	ARL14	3.096×10⁻⁵	-0.873194	Down
ENSG00000179915	NRXN1	2.541×10⁻²³	-1.16437	Down
ENSG00000180198	RCC1	2.34×10⁻⁴²	-0.61147	Down
ENSG00000180257	ZNF816	4.797×10⁻⁴	-0.711943	Down
ENSG00000180287	PLD5	2.363×10⁻¹⁴	-1.87683	Down
ENSG00000180537	RNF182	5.459×10⁻¹⁷	-0.947272	Down
ENSG00000180914	OXTR	4.317×10⁻²¹	-0.80534	Down
ENSG00000181007	ZFP82	5.489×10⁻³	-0.616558	Down
ENSG00000181026	AEN	6.774×10⁻⁴⁹	-1.33051	Down
ENSG00000181191	PJA1	2.78×10⁻⁶	-1.62869	Down
ENSG00000181449	SOX2	5.78×10⁻¹⁸	-1.42214	Down
ENSG00000181544	FANCB	1.9×10⁻⁴	-0.58754	Down
ENSG00000181752	OR8K5	1.223×10⁻³	-1.12655	Down
ENSG00000181896	ZNF101	1.284×10⁻⁴	-0.596269	Down
ENSG00000181938	GINS3	1.42×10⁻²⁸	-0.994659	Down
ENSG00000182107	TMEM30B	1.192×10⁻⁷	-1.45471	Down
ENSG00000182132	KCNIP1	2.962×10⁻¹⁴	-1.55218	Down
ENSG00000182257	PRR34	2.405×10⁻²	-0.818341	Down
ENSG00000182326	C1S	7.991×10⁻⁸	-0.628654	Down
ENSG00000182557	SPNS3	4.337×10⁻⁴	-0.883341	Down
ENSG00000182628	SKA2	1.881×10⁻⁴⁷	-0.785608	Down
ENSG00000182985	CADM1	8.08×10⁻²⁶	-0.749069	Down
ENSG00000182986	ZNF320	3.234×10⁻⁸	-2.5152	Down
ENSG00000183018	SPNS2	3.048×10⁻²²⁹	-1.64363	Down
ENSG00000183091	NEB	1.932×10⁻²	-0.774629	Down
ENSG00000183137	CEP57L1	3.759×10⁻⁷	-0.636505	Down
ENSG00000183317	EPHA10	1.314×10⁻⁸	-0.921169	Down
ENSG00000183421	RIPK4	1.297×10⁻⁹	-0.663993	Down
ENSG00000183439	TRIM61	1.01×10⁻²	-0.690307	Down
ENSG00000183647	ZNF530	2.223×10⁻⁵	-0.643469	Down
ENSG00000183684	ALYREF	1.68×10⁻²⁸	-0.739316	Down
ENSG00000183762	KREMEN1	1.031×10⁻²⁶	-1.01668	Down
ENSG00000184005	ST6GALNAC3	2.164×10⁻²	-0.619513	Down
ENSG00000184156	KCNQ3	1.095×10⁻²⁸	-1.28422	Down
ENSG00000184304	PRKD1	1.874×10⁻⁶	-0.626154	Down
ENSG00000184454	NCMAP	4.655×10⁻¹⁰	-1.26113	Down
ENSG00000184584	TMEM173	2.529×10⁻¹⁵	-0.882667	Down
ENSG00000184785	SMIM10	1.243×10⁻²⁵	-0.759247	Down
ENSG00000184838	PRR16	6.757×10⁻²⁴	-1.12034	Down
ENSG00000184939	ZFP90	8.13×10⁻⁸	-0.613746	Down
ENSG00000184992	BRI3BP	7.865×10⁻³⁰	-0.751674	Down
ENSG00000185305	ARL15	5.689×10⁻⁶	-1.00106	Down
ENSG00000185436	IFNLR1	2.298×10⁻⁵	-0.598279	Down
ENSG00000185507	IRF7	1.965×10⁻¹⁷	-0.759736	Down
ENSG00000186166	CCDC84	1.276×10⁻⁸	-0.623617	Down
ENSG00000186185	KIF18B	3.286×10⁻²⁷	-0.596625	Down
ENSG00000186469	GNG2	3.812×10⁻¹⁸	-0.806672	Down
ENSG00000186660	ZFP91	5.632×10⁻³⁵	-0.651138	Down
ENSG00000186867	QRFPR	1.077×10⁻⁶	-0.606954	Down
ENSG00000187098	MITF	4.92×10⁻⁵⁵	-0.906225	Down
ENSG00000187514	PTMA	2.479×10⁻²⁶	-0.624448	Down
ENSG00000187726	DNAJB13	1.183×10⁻¹⁴	-2.07158	Down
ENSG00000187800	PEAR1	3.322×10⁻⁹	-0.843661	Down
ENSG00000187840	EIF4EBP1	2.555×10⁻²³	-0.610297	Down
ENSG00000188015	S100A3	2.151×10⁻²⁰	-1.11	Down
ENSG00000188064	WNT7B	1.582×10⁻²⁴²	-2.14318	Down
ENSG00000188153	COL4A5	2.08×10⁻³	-1.10211	Down
ENSG00000188229	TUBB4B	9.416×10⁻⁴⁶	-0.585848	Down
ENSG00000188290	HES4	2.895×10⁻¹⁴	-0.767316	Down
ENSG00000188295	ZNF669	5.201×10⁻⁶	-0.660843	Down
ENSG00000188404	SELL	5.098×10⁻⁶	-1.13112	Down
ENSG00000188486	H2AFX	1.531×10⁻⁷¹	-0.817845	Down
ENSG00000188807	TMEM201	5.397×10⁻²⁹	-0.671812	Down
ENSG00000189001	SBSN	2.89×10⁻¹⁰	-0.625604	Down
ENSG00000189052	CGB5	1.917×10⁻³	-0.617383	Down
ENSG00000189057	FAM111B	3.782×10⁻⁷⁵	-1.32702	Down
ENSG00000189159	JPT1	4.096×10⁻²⁴	-0.649343	Down
ENSG00000196172	ZNF681	2.661×10⁻³	-0.907481	Down
ENSG00000196182	STK40	6.425×10⁻²⁴	-0.687581	Down
ENSG00000196526	AFAP1	5.615×10⁻²⁵	-1.69961	Down
ENSG00000196584	XRCC2	6.526×10⁻²⁵	-1.00264	Down
ENSG00000196611	MMP1	2.957×10⁻³¹	-1.37911	Down
ENSG00000196739	COL27A1	3.835×10⁻⁶	-1.14528	Down
ENSG00000196754	S100A2	1.666×10⁻¹¹	-1.0677	Down
ENSG00000196876	SCN8A	5.802×10⁻⁵	-0.793578	Down
ENSG00000197020	ZNF100	5.71×10⁻⁷	-0.946534	Down
ENSG00000197142	ACSL5	3.031×10⁻²⁷	-0.651139	Down
ENSG00000197147	LRRC8B	1.133×10⁻¹⁸	-0.725253	Down
ENSG00000197275	RAD54B	7.062×10⁻¹⁰	-0.692352	Down
ENSG00000197312	DDI2	1.612×10⁻¹⁷	-0.595449	Down
ENSG00000197385	ZNF860	4.836×10⁻⁴	-0.703601	Down
ENSG00000197408	CYP2B6	3.777×10⁻³³	-1.20137	Down
ENSG00000197451	HNRNPAB	6.395×10⁻⁷²	-0.83411	Down
ENSG00000197472	ZNF695	1.428×10⁻⁹	-0.809264	Down
ENSG00000197646	PDCD1LG2	1.01×10⁻¹⁰	-1.44784	Down
ENSG00000197822	OCLN	1.727×10⁻¹⁷	-0.630621	Down
ENSG00000197872	FAM49A	3.123×10⁻³⁸	-0.750046	Down
ENSG00000198056	PRIM1	9.93×10⁻¹⁹	-0.590299	Down
ENSG00000198074	AKR1B10	5.581×10⁻²⁸	-0.750064	Down
ENSG00000198088	NUP62CL	1.826×10⁻³	-0.893701	Down
ENSG00000198521	ZNF43	4.24×10⁻¹¹	-1.51471	Down
ENSG00000198538	ZNF28	9.775×10⁻⁷	-0.624434	Down
ENSG00000198554	WDHD1	6.487×10⁻⁹⁷	-1.65383	Down
ENSG00000198673	FAM19A2	2.198×10⁻⁵	-0.8389	Down
ENSG00000198695	MT-ND6	7.536×10⁻²⁸	-0.7608	Down
ENSG00000198780	FAM169A	2.884×10⁻¹⁴	-0.964255	Down
ENSG00000198786	MT-ND5	9.125×10⁻²⁹	-0.75418	Down
ENSG00000198807	PAX9	1.193×10⁻²	-0.942264	Down
ENSG00000198830	HMGN2	4.129×10⁻⁵⁵	-0.707538	Down
ENSG00000204262	COL5A2	1.614×10⁻⁴	-0.629102	Down
ENSG00000204267	TAP2	6.246×10⁻²⁵	-0.611244	Down
ENSG00000204287	HLA-DRA	1.067×10⁻²⁰	-0.64966	Down
ENSG00000204397	CARD16	4.796×10⁻⁴	-0.638146	Down
ENSG00000204610	TRIM15	1.709×10⁻⁴	-0.957166	Down
ENSG00000204740	MALRD1	1.271×10⁻²⁵	-2.29152	Down
ENSG00000204767	INSYN2B	7.595×10⁻⁵	-0.73575	Down
ENSG00000204936	CD177	6.388×10⁻¹⁵	-1.04731	Down
ENSG00000204941	PSG5	1.053×10⁻¹⁵	-1.17528	Down
ENSG00000205323	SARNP	1.185×10⁻²	-0.588779	Down
ENSG00000205476	CCDC85C	5.938×10⁻²⁷	-0.771494	Down
ENSG00000205683	DPF3	6.842×10⁻⁹	-0.729428	Down
ENSG00000211445	GPX3	4.×10⁻⁴⁰	-1.02413	Down
ENSG00000212719	C17orf51	7.766×10⁻¹²	-0.641618	Down
ENSG00000212724	KRTAP2-3	2.149×10⁻¹⁶	-0.72987	Down
ENSG00000212725	KRTAP2-1	6.19×10⁻³	-0.851142	Down
ENSG00000213185	FAM24B	2.052×10⁻⁵	-0.862139	Down
ENSG00000213417	KRTAP2-4	6.303×10⁻⁵	-0.74353	Down
ENSG00000213424	KRT222	1.608×10⁻²⁴	-1.59002	Down
ENSG00000213551	DNAJC9	6.771×10⁻⁵⁶	-0.801165	Down
ENSG00000213625	LEPROT	7.588×10⁻⁶³	-0.735424	Down
ENSG00000213694	S1PR3	1.047×10⁻⁴⁸	-2.2514	Down
ENSG00000213793	ZNF888	5.045×10⁻⁶	-1.34244	Down
ENSG00000213967	ZNF726	5.286×10⁻⁷	-1.08573	Down
ENSG00000214114	MYCBP	3.937×10⁻¹⁸	-0.616664	Down
ENSG00000214193	SH3D21	2.341×10⁻¹⁶	-0.981505	Down
ENSG00000214518	KRTAP2-2	5.996×10⁻³	-0.900942	Down
ENSG00000215018	COL28A1	1.36×10⁻²	-0.664339	Down
ENSG00000215883	CYB5RL	9.021×10⁻⁷	-0.773349	Down
ENSG00000221869	CEBPD	2.901×10⁻¹⁵	-0.620906	Down
ENSG00000221887	HMSD	7.855×10⁻¹⁴	-1.5763	Down
ENSG00000221963	APOL6	3.195×10⁻⁵⁹	-0.997258	Down
ENSG00000221995	TIAF1	2.573×10⁻¹⁰	-0.890977	Down
ENSG00000223638	RFPL4A	2.752×10⁻¹⁰	-1.59544	Down
ENSG00000225932	CTAGE4	1.52×10⁻²	-1.42924	Down
ENSG00000226784	PGAM4	4.331×10⁻²	-0.594946	Down
ENSG00000227471	AKR1B15	8.94×10⁻³	-0.772357	Down
ENSG00000228696	ARL17B	1.048×10⁻⁵	-1.08575	Down
ENSG00000228716	DHFR	2.237×10⁻⁴¹	-0.874273	Down
ENSG00000230453	ANKRD18B	1.266×10⁻²	-0.63063	Down
ENSG00000234444	ZNF736	4.642×10⁻¹¹	-0.909768	Down
ENSG00000239306	RBM14	1.473×10⁻³⁹	-0.733133	Down
ENSG00000239713	APOBEC3G	2.281×10⁻⁶	-0.740487	Down
ENSG00000240053	LY6G5B	4.426×10⁻⁷	-0.781123	Down
ENSG00000241119	UGT1A9	1.1×10⁻²	-1.50429	Down
ENSG00000241635	UGT1A1	4.525×10⁻⁷	-1.33881	Down
ENSG00000242265	PEG10	1.883×10⁻¹⁴⁴	-1.24046	Down
ENSG00000242574	HLA-DMB	8.56×10⁻²⁶	-1.29352	Down
ENSG00000243056	EIF4EBP3	2.978×10⁻⁷	-1.10636	Down
ENSG00000243566	UPK3B	4.125×10⁻⁴	-0.802425	Down
ENSG00000243811	APOBEC3D	2.047×10⁻²	-0.608411	Down
ENSG00000244694	PTCHD4	3.384×10⁻⁴	-0.805454	Down
ENSG00000250799	PRODH2	3.238×10⁻²⁰	-1.57947	Down
ENSG00000253485	PCDHGA5	1.489×10⁻⁴	-1.08048	Down
ENSG00000253731	PCDHGA6	4.461×10⁻⁶	-0.892168	Down
ENSG00000254093	PINX1	1.694×10⁻⁶	-0.67582	Down
ENSG00000254535	PABPC4L	6.427×10⁻⁶	-0.667991	Down
ENSG00000255508	AP002990.1	4.801×10⁻²	-0.896842	Down
ENSG00000257093	KIAA1147	2.142×10⁻²³	-0.60498	Down
ENSG00000257207	AC112229.3	1.73×10⁻³	-0.5967	Down
ENSG00000258311	AC009779.3	1.589×10⁻⁷	-0.74883	Down
ENSG00000258555	SPECC1L-ADORA2A	4.092×10⁻⁶	-0.603387	Down
ENSG00000258989	AL355916.2	1.2×10⁻³⁰	-1.20426	Down
ENSG00000260238	PMF1-BGLAP	3.893×10⁻²	-1.82859	Down
ENSG00000265763	ZNF488	1.755×10⁻⁸	-0.668357	Down
ENSG00000268089	GABRQ	2.033×10⁻⁵	-0.861935	Down
ENSG00000268940	CT45A1	2.367×10⁻²	-0.588804	Down
ENSG00000269405	NXF2	9.419×10⁻¹⁶	-1.7684	Down
ENSG00000269586	CT45A10	1.883×10⁻⁶	-0.756714	Down
ENSG00000270136	MINOS1-NBL1	9.154×10⁻³	-0.927693	Down
ENSG00000271605	MILR1	7.701×10⁻⁷	-0.629553	Down
ENSG00000273899	NOL12	8.111×10⁻¹³	-0.59382	Down
ENSG00000276023	DUSP14	6.398×10⁻³³	-0.786097	Down
ENSG00000276043	UHRF1	1.863×10⁻⁹⁰	-1.00227	Down
ENSG00000278023	RDM1	1.023×10⁻¹¹	-1.03609	Down
ENSG00000278259	MYO19	8.288×10⁻³⁸	-0.607402	Down
ENSG00000278535	DHRS11	1.12×10⁻¹⁴	-0.591506	Down
ENSG00000280670	CCDC163	1.711×10⁻²	-0.693479	Down
ENSG00000283932	AL121722.1	3.943×10⁻⁵	-1.34614	Down
ENSG00000284292	AC004922.1	1.585×10⁻⁴	-3.37568	Down
ENSG00000284337	AC013271.1	9.955×10⁻⁵	-2.07073	Down
ENSG00000284946	AC068831.7	2.976×10⁻³	-0.782712	Down
ENSG00000285447	ZNF883	7.274×10⁻⁶	-0.589107	Down
Homo_sapiens_newGene_10021	--	7.693×10⁻¹⁰	-0.657336	Down
Homo_sapiens_newGene_10148	--	6.911×10⁻⁷	-0.760762	Down
Homo_sapiens_newGene_10233	--	7.693×10⁻⁹	-0.983964	Down
Homo_sapiens_newGene_10246	--	8.626×10⁻³	-1.05819	Down
Homo_sapiens_newGene_10293	--	2.484×10⁻⁸	-1.24451	Down
Homo_sapiens_newGene_10411	--	2.394×10⁻⁵	-0.939276	Down
Homo_sapiens_newGene_10413	--	9.434×10⁻⁶	-1.43044	Down
Homo_sapiens_newGene_10428	--	7.015×10⁻⁷	-0.900286	Down
Homo_sapiens_newGene_10505	--	2.367×10⁻⁵	-0.675944	Down
Homo_sapiens_newGene_10574	--	2.397×10⁻³	-0.614049	Down
Homo_sapiens_newGene_10621	--	3.47×10⁻⁷	-0.697163	Down
Homo_sapiens_newGene_10685	--	2.947×10⁻⁵⁰	-0.760888	Down
Homo_sapiens_newGene_10701	--	1.617×10⁻²	-0.924008	Down
Homo_sapiens_newGene_108	--	6.699×10⁻⁵	-1.2856	Down
Homo_sapiens_newGene_10811	--	1.379×10⁻⁷	-1.99085	Down
Homo_sapiens_newGene_10869	--	2.847×10⁻⁴	-0.889708	Down
Homo_sapiens_newGene_10995	--	3.189×10⁻⁵	-0.605761	Down
Homo_sapiens_newGene_11017	--	9.049×10⁻⁴	-1.21857	Down
Homo_sapiens_newGene_1103	--	1.565×10⁻¹³	-0.955156	Down
Homo_sapiens_newGene_11159	--	8.12×10⁻³	-0.736488	Down
Homo_sapiens_newGene_11165	--	3.427×10⁻²	-0.647487	Down
Homo_sapiens_newGene_11208	--	1.713×10⁻⁴	-1.31625	Down
Homo_sapiens_newGene_11261	--	1.654×10⁻⁵	-1.09064	Down
Homo_sapiens_newGene_11268	--	9.467×10⁻¹⁶	-0.928217	Down
Homo_sapiens_newGene_11269	--	6.996×10⁻²⁵	-0.794299	Down
Homo_sapiens_newGene_11286	--	2.513×10⁻⁷	-0.623014	Down
Homo_sapiens_newGene_11413	--	1.629×10⁻⁵	-1.37864	Down
Homo_sapiens_newGene_11764	--	2.386×10⁻⁶	-0.889766	Down
Homo_sapiens_newGene_11799	--	3.412×10⁻³	-0.716801	Down
Homo_sapiens_newGene_11924	--	7.293×10⁻⁷	-1.64733	Down
Homo_sapiens_newGene_11928	--	2.441×10⁻⁷	-0.746985	Down
Homo_sapiens_newGene_11994	--	7.459×10⁻¹³	-1.73324	Down
Homo_sapiens_newGene_11996	--	4.749×10⁻⁴	-1.27816	Down
Homo_sapiens_newGene_12179	--	1.382×10⁻⁸	-1.82549	Down
Homo_sapiens_newGene_12224	--	1.083×10⁻¹⁵	-2.75453	Down
Homo_sapiens_newGene_12228	--	8.057×10⁻¹³	-3.13495	Down
Homo_sapiens_newGene_12279	--	9.353×10⁻⁶	-0.585789	Down
Homo_sapiens_newGene_12370	--	3.133×10⁻²	-0.6086	Down
Homo_sapiens_newGene_12391	--	4.868×10⁻⁵	-1.34081	Down
Homo_sapiens_newGene_12395	--	4.19×10⁻¹⁴⁰	-2.41997	Down
Homo_sapiens_newGene_1240	--	3.001×10⁻¹¹	-0.642599	Down
Homo_sapiens_newGene_12481	--	1.036×10⁻³	-1.1868	Down
Homo_sapiens_newGene_12503	--	6.001×10⁻⁹	-0.74979	Down
Homo_sapiens_newGene_12518	--	1.944×10⁻⁵	-1.15792	Down
Homo_sapiens_newGene_12716	--	2.517×10⁻¹²	-0.584984	Down
Homo_sapiens_newGene_1277	--	2.781×10⁻³	-1.15111	Down
Homo_sapiens_newGene_1286	--	3.594×10⁻³	-0.829364	Down
Homo_sapiens_newGene_12867	--	4.847×10⁻⁴	-0.644675	Down
Homo_sapiens_newGene_12962	--	1.052×10⁻¹⁶	-1.75756	Down
Homo_sapiens_newGene_12981	--	2.939×10⁻¹⁰	-0.879471	Down
Homo_sapiens_newGene_13006	--	6.037×10⁻³	-0.779289	Down
Homo_sapiens_newGene_13089	--	4.202×10⁻¹⁸	-0.768108	Down
Homo_sapiens_newGene_13173	--	1.239×10⁻⁷	-1.30143	Down
Homo_sapiens_newGene_13177	--	3.205×10⁻⁷	-0.65359	Down
Homo_sapiens_newGene_13182	--	4.63×10⁻¹⁰	-0.70359	Down
Homo_sapiens_newGene_13309	--	3.955×10⁻²	-0.753201	Down
Homo_sapiens_newGene_13371	--	5.669×10⁻⁴	-0.721067	Down
Homo_sapiens_newGene_13398	--	2.274×10⁻³	-0.597463	Down
Homo_sapiens_newGene_13550	--	2.646×10⁻⁵	-1.37625	Down
Homo_sapiens_newGene_13580	--	5.273×10⁻¹⁸	-0.903172	Down
Homo_sapiens_newGene_1370	--	1.732×10⁻¹⁰⁶	-1.17342	Down
Homo_sapiens_newGene_1371	--	1.675×10⁻⁹³	-1.33551	Down
Homo_sapiens_newGene_13745	--	4.469×10⁻²	-0.617751	Down
Homo_sapiens_newGene_13754	--	3.86×10⁻⁴	-0.888459	Down
Homo_sapiens_newGene_1376	--	2.44×10⁻²	-0.671703	Down
Homo_sapiens_newGene_13938	--	1.576×10⁻³⁹	-1.91139	Down
Homo_sapiens_newGene_13946	--	1.135×10⁻⁹	-0.715737	Down
Homo_sapiens_newGene_14046	--	4.304×10⁻²	-0.747048	Down
Homo_sapiens_newGene_14055	--	1.565×10⁻²⁹	-1.20782	Down
Homo_sapiens_newGene_14197	--	7.977×10⁻⁶	-1.07724	Down
Homo_sapiens_newGene_14349	--	8.751×10⁻⁴	-0.841217	Down
Homo_sapiens_newGene_14593	--	3.494×10⁻²	-0.642848	Down
Homo_sapiens_newGene_14683	--	1.442×10⁻²	-0.657442	Down
Homo_sapiens_newGene_1545	--	8.806×10⁻⁴	-0.808733	Down
Homo_sapiens_newGene_1597	--	1.158×10⁻²	-0.618231	Down
Homo_sapiens_newGene_1704	--	2.395×10⁻⁹	-1.04904	Down
Homo_sapiens_newGene_1943	--	4.061×10⁻²	-0.637471	Down
Homo_sapiens_newGene_1968	--	8.833×10⁻¹²	-1.00053	Down
Homo_sapiens_newGene_2052	--	3.19×10⁻²	-0.593424	Down
Homo_sapiens_newGene_2176	--	3.025×10⁻⁴	-1.13412	Down
Homo_sapiens_newGene_2180	--	1.476×10⁻²	-0.841328	Down
Homo_sapiens_newGene_2220	--	1.952×10⁻⁸¹	-2.11638	Down
Homo_sapiens_newGene_2238	--	5.921×10⁻⁴	-0.776264	Down
Homo_sapiens_newGene_2321	--	1.3×10⁻²	-0.721204	Down
Homo_sapiens_newGene_2339	--	1.046×10⁻³⁶	-1.50655	Down
Homo_sapiens_newGene_2445	--	1.76×10⁻⁵	-1.52431	Down
Homo_sapiens_newGene_2530	--	3.052×10⁻¹⁵	-0.957913	Down
Homo_sapiens_newGene_2559	--	2.961×10⁻³	-1.00778	Down
Homo_sapiens_newGene_2566	--	4.226×10⁻³	-0.596105	Down
Homo_sapiens_newGene_2588	--	7.964×10⁻³	-0.889698	Down
Homo_sapiens_newGene_2600	--	4.029×10⁻⁵	-0.690829	Down
Homo_sapiens_newGene_2652	--	2.321×10⁻³	-1.03207	Down
Homo_sapiens_newGene_2657	--	4.382×10⁻⁵⁷	-1.7715	Down
Homo_sapiens_newGene_2861	--	8.023×10⁻⁵	-1.26237	Down
Homo_sapiens_newGene_3065	--	2.783×10⁻³	-1.02206	Down
Homo_sapiens_newGene_3204	--	2.085×10⁻⁵⁰	-2.33875	Down
Homo_sapiens_newGene_3217	--	5.441×10⁻⁸	-0.657938	Down
Homo_sapiens_newGene_3478	--	1.059×10⁻⁸	-0.810904	Down
Homo_sapiens_newGene_3690	--	6.848×10⁻³	-0.873354	Down
Homo_sapiens_newGene_3694	--	7.46×10⁻²⁸	-0.706207	Down
Homo_sapiens_newGene_3819	--	4.749×10⁻³	-0.927412	Down
Homo_sapiens_newGene_4202	--	3.129×10⁻⁵	-1.16524	Down
Homo_sapiens_newGene_4387	--	2.507×10⁻⁴	-0.617448	Down
Homo_sapiens_newGene_4388	--	1.135×10⁻⁷	-1.06231	Down
Homo_sapiens_newGene_4470	--	2.994×10⁻⁵	-0.683775	Down
Homo_sapiens_newGene_4624	--	6.479×10⁻⁵¹	-1.5276	Down
Homo_sapiens_newGene_4681	--	2.02×10⁻⁵	-1.48919	Down
Homo_sapiens_newGene_4683	--	5.726×10⁻³	-0.692225	Down
Homo_sapiens_newGene_4688	--	3.508×10⁻⁸	-1.1358	Down
Homo_sapiens_newGene_4881	--	4.609×10⁻²	-0.62149	Down
Homo_sapiens_newGene_4996	--	1.345×10⁻²	-0.914773	Down
Homo_sapiens_newGene_5123	--	2.411×10⁻⁸	-1.60637	Down
Homo_sapiens_newGene_5211	--	4.732×10⁻³	-0.726572	Down
Homo_sapiens_newGene_5227	--	6.453×10⁻⁴⁰	-1.43221	Down
Homo_sapiens_newGene_5236	--	8.818×10⁻³	-0.662719	Down
Homo_sapiens_newGene_5311	--	1.719×10⁻²	-0.838242	Down
Homo_sapiens_newGene_5367	--	8.718×10⁻⁴	-1.00642	Down
Homo_sapiens_newGene_538	--	1.721×10⁻¹²	-3.25726	Down
Homo_sapiens_newGene_5624	--	4.649×10⁻⁴	-0.696996	Down
Homo_sapiens_newGene_5628	--	2.702×10⁻¹⁰	-0.719088	Down
Homo_sapiens_newGene_5655	--	1.426×10⁻⁵	-0.622683	Down
Homo_sapiens_newGene_5680	--	1.619×10⁻¹⁰	-0.643186	Down
Homo_sapiens_newGene_592	--	8.074×10⁻⁸	-0.690622	Down
Homo_sapiens_newGene_593	--	1.095×10⁻¹¹	-1.93656	Down
Homo_sapiens_newGene_6016	--	5.526×10⁻⁴	-0.978941	Down
Homo_sapiens_newGene_6102	--	2.098×10⁻⁷	-0.656114	Down
Homo_sapiens_newGene_6247	--	2.027×10⁻²	-0.611423	Down
Homo_sapiens_newGene_6287	--	3.961×10⁻²	-0.604801	Down
Homo_sapiens_newGene_6330	--	1.104×10⁻¹⁴	-0.948862	Down
Homo_sapiens_newGene_6446	--	4.29×10⁻³⁶	-1.23006	Down
Homo_sapiens_newGene_6509	--	1.691×10⁻⁴	-0.930367	Down
Homo_sapiens_newGene_6522	--	9.59×10⁻⁶	-0.629588	Down
Homo_sapiens_newGene_6543	--	3.635×10⁻³	-0.884619	Down
Homo_sapiens_newGene_6622	--	5.255×10⁻⁶⁴	-2.06429	Down
Homo_sapiens_newGene_6881	--	6.119×10⁻⁶	-0.855545	Down
Homo_sapiens_newGene_6921	--	5.88×10⁻⁵	-0.719353	Down
Homo_sapiens_newGene_6935	--	7.885×10⁻³	-0.691965	Down
Homo_sapiens_newGene_6940	--	7.178×10⁻⁹	-1.29113	Down
Homo_sapiens_newGene_6971	--	4.736×10⁻⁹	-1.63694	Down
Homo_sapiens_newGene_6975	--	3.792×10⁻¹⁴	-2.62473	Down
Homo_sapiens_newGene_710	--	2.648×10⁻⁵	-1.51825	Down
Homo_sapiens_newGene_7201	--	1.08×10⁻²	-1.02215	Down
Homo_sapiens_newGene_738	--	2.55×10⁻⁶	-1.7751	Down
Homo_sapiens_newGene_7488	--	1.246×10⁻³	-1.21283	Down
Homo_sapiens_newGene_7535	--	3.316×10⁻²	-0.629606	Down
Homo_sapiens_newGene_7630	--	3.082×10⁻²	-0.630003	Down
Homo_sapiens_newGene_7683	--	1.733×10⁻³	-1.013	Down
Homo_sapiens_newGene_7690	--	3.375×10⁻⁷	-0.767892	Down
Homo_sapiens_newGene_7694	--	2.713×10⁻¹²	-1.13013	Down
Homo_sapiens_newGene_7840	--	2.444×10⁻⁵	-1.61441	Down
Homo_sapiens_newGene_7929	--	1.676×10⁻⁴	-0.900363	Down
Homo_sapiens_newGene_7976	--	3.205×10⁻⁷	-0.797263	Down
Homo_sapiens_newGene_8073	--	3.533×10⁻³	-0.911557	Down
Homo_sapiens_newGene_8132	--	3.942×10⁻²	-0.640969	Down
Homo_sapiens_newGene_8320	--	2.553×10⁻³	-1.11905	Down
Homo_sapiens_newGene_8361	--	4.627×10⁻³³	-2.07287	Down
Homo_sapiens_newGene_8364	--	3.085×10⁻²⁶	-0.92581	Down
Homo_sapiens_newGene_8428	--	3.493×10⁻³	-0.986755	Down
Homo_sapiens_newGene_8468	--	4.452×10⁻³⁶	-1.38022	Down
Homo_sapiens_newGene_8477	--	6.902×10⁻¹²	-0.59627	Down
Homo_sapiens_newGene_8512	--	1.445×10⁻⁴	-0.765661	Down
Homo_sapiens_newGene_8520	--	8.364×10⁻⁷	-1.42721	Down
Homo_sapiens_newGene_8523	--	1.222×10⁻⁶	-1.70641	Down
Homo_sapiens_newGene_8733	--	8.145×10⁻⁵	-0.711543	Down
Homo_sapiens_newGene_8790	--	3.701×10⁻²	-0.647344	Down
Homo_sapiens_newGene_8921	--	2.918×10⁻⁶⁴	-1.57762	Down
Homo_sapiens_newGene_8997	--	5.441×10⁻¹²	-0.936845	Down
Homo_sapiens_newGene_9074	--	4.067×10⁻⁶	-1.09915	Down
Homo_sapiens_newGene_9113	--	2.903×10⁻³	-0.753557	Down
Homo_sapiens_newGene_9117	--	4.492×10⁻¹¹	-1.32499	Down
Homo_sapiens_newGene_9118	--	1.36×10⁻⁷	-1.93201	Down
Homo_sapiens_newGene_9450	--	2.541×10⁻¹⁵	-1.36261	Down
Homo_sapiens_newGene_948	--	5.406×10⁻³	-0.865259	Down
Homo_sapiens_newGene_9487	--	3.057×10⁻⁴	-0.655179	Down
Homo_sapiens_newGene_9521	--	8.86×10⁻¹⁴	-0.620308	Down
Homo_sapiens_newGene_9522	--	2.123×10⁻¹²	-0.681052	Down
Homo_sapiens_newGene_9524	--	1.636×10⁻²	-0.737082	Down
Homo_sapiens_newGene_9556	--	1.055×10⁻⁸	-0.620623	Down
Homo_sapiens_newGene_9577	--	3.414×10⁻⁹	-0.629612	Down
Homo_sapiens_newGene_9616	--	6.692×10⁻⁴	-0.607901	Down
Homo_sapiens_newGene_9630	--	1.76×10⁻¹⁹	-1.5744	Down
Homo_sapiens_newGene_9756	--	6.344×10⁻⁶	-0.704778	Down
Homo_sapiens_newGene_9842	--	2.159×10⁻²	-0.715883	Down
Homo_sapiens_newGene_9843	--	4.399×10⁻¹⁰	-0.781421	Down
Homo_sapiens_newGene_9853	--	1.252×10⁻²	-0.929115	Down
Homo_sapiens_newGene_9855	--	8.948×10⁻²⁵	-0.827761	Down
Homo_sapiens_newGene_9886	--	7.405×10⁻⁷	-0.711257	Down
Homo_sapiens_newGene_9907	--	2.199×10⁻⁵	-0.935288	Down
Homo_sapiens_newGene_9962	--	4.196×10⁻¹⁵	-0.624115	Down
